# Supplementary material
Source: MDPI journal article supplement (https://www.mdpi.com/2304-6740/5/4/88)

# checkCIF/PLATON report

Structure factors have been supplied for datablock(s) 0800

THIS REPORT IS FOR GUIDANCE ONLY. IF USED AS PART OF A REVIEW PROCEDURE FOR PUBLICATION, IT SHOULD NOT REPLACE THE EXPERTISE OF AN EXPERIENCED CRYSTALLOGRAPHIC REFEREE.

No syntax errors found.      CIF dictionary      Interpreting this report

## Datablock: 0800

---

|                 |                        |                        |             |
|-----------------|------------------------|------------------------|-------------|
| Bond precision: | C-C = 0.0035 A         | Wavelength=0.71073     |             |
| Cell:           | a=9.5760(14)           | b=9.7100(17)           | c=41.176(4) |
|                 | alpha=90               | beta=90                | gamma=90    |
| Temperature:    | 173 K                  |                        |             |
|                 | Calculated             | Reported               |             |
| Volume          | 3828.7(9)              | 3828.7(9)              |             |
| Space group     | P 21 21 21             | P 21 21 21             |             |
| Hall group      | P 2ac 2ab              | P 2ac 2ab              |             |
| Moiety formula  | C17 H22 N Si, C2 F3 O2 | C17 H22 N Si, C2 F3 O2 |             |
| Sum formula     | C19 H22 F3 N O2 Si     | C19 H22 F3 N O2 Si     |             |
| Mr              | 381.47                 | 381.47                 |             |
| Dx,g cm-3       | 1.324                  | 1.324                  |             |
| Z               | 8                      | 8                      |             |
| Mu (mm-1)       | 0.163                  | 0.163                  |             |
| F000            | 1600.0                 | 1600.0                 |             |
| F000'           | 1601.57                |                        |             |
| h,k,lmax        | 11,11,48               | 11,11,48               |             |
| Nref            | 6752[ 3851]            | 6661                   |             |
| Tmin,Tmax       | 0.962,0.968            | 0.938,0.968            |             |
| Tmin'           | 0.937                  |                        |             |

Correction method= # Reported T Limits: Tmin=0.938 Tmax=0.968  
AbsCorr = MULTI-SCAN

Data completeness= 1.73/0.99      Theta(max)= 25.000

R(reflections)= 0.0340( 4893)      wR2(reflections)= 0.0592( 6661)

S = 1.000      Npar= 566

---

The following ALERTS were generated. Each ALERT has the format

**test-name\_ALERT\_alert-type\_alert-level.**

Click on the hyperlinks for more details of the test.

---

**🔴 Alert level A**

|                   |          |                                   |     |        |
|-------------------|----------|-----------------------------------|-----|--------|
| PLAT214_ALERT_2_A | Atom F2B | (Anion/Solvent) ADP max/min Ratio | 7.5 | prolat |
| PLAT214_ALERT_2_A | Atom F3B | (Anion/Solvent) ADP max/min Ratio | 7.8 | prolat |

---

**🟡 Alert level B**

|                   |                         |                    |      |     |      |     |           |
|-------------------|-------------------------|--------------------|------|-----|------|-----|-----------|
| PLAT230_ALERT_2_B | Hirshfeld Test Diff for | C15                | --   | C16 | ..   | 9.5 | s.u.      |
| PLAT353_ALERT_3_B | Long                    | N-H (N0.87,N1.01A) | N2   | -   | H3N  | ..  | 1.08 Ang. |
| PLAT412_ALERT_2_B | Short Intra XH3 ..      | XHn                | H35C | ..  | H36A | ..  | 1.77 Ang. |

---

**🟢 Alert level C**

|                   |                                                  |       |        |        |    |      |      |
|-------------------|--------------------------------------------------|-------|--------|--------|----|------|------|
| PLAT089_ALERT_3_C | Poor Data / Parameter Ratio (Zmax < 18) .....    | 6.76  | Note   |        |    |      |      |
| PLAT214_ALERT_2_C | Atom F5B (Anion/Solvent) ADP max/min Ratio       | 4.2   | prolat |        |    |      |      |
| PLAT221_ALERT_2_C | Solv./Anion Resd 3 F Ueq(max)/Ueq(min) Range     | 5.6   | Ratio  |        |    |      |      |
| PLAT222_ALERT_3_C | Non-Solvent Resd 1 H Uiso(max)/Uiso(min) Range   | 8.3   | Ratio  |        |    |      |      |
| PLAT230_ALERT_2_C | Hirshfeld Test Diff for                          | Si2   | --     | C20    | .. | 5.1  | s.u. |
| PLAT230_ALERT_2_C | Hirshfeld Test Diff for                          | Si2   | --     | C33    | .. | 5.8  | s.u. |
| PLAT230_ALERT_2_C | Hirshfeld Test Diff for                          | C29   | --     | C30    | .. | 6.5  | s.u. |
| PLAT231_ALERT_4_C | Hirshfeld Test (Solvent)                         | O4    | --     | C37    | .. | 6.5  | s.u. |
| PLAT234_ALERT_4_C | Large Hirshfeld Difference                       | F4B   | --     | C38    | .. | 0.18 | Ang. |
| PLAT234_ALERT_4_C | Large Hirshfeld Difference                       | F5B   | --     | C38    | .. | 0.18 | Ang. |
| PLAT234_ALERT_4_C | Large Hirshfeld Difference                       | F6B   | --     | C38    | .. | 0.16 | Ang. |
| PLAT241_ALERT_2_C | High 'MainMol' Ueq as Compared to Neighbors of   | C16   | Check  |        |    |      |      |
| PLAT244_ALERT_4_C | Low 'Solvent' Ueq as Compared to Neighbors of    | C18   | Check  |        |    |      |      |
| PLAT244_ALERT_4_C | Low 'Solvent' Ueq as Compared to Neighbors of    | C37   | Check  |        |    |      |      |
| PLAT245_ALERT_2_C | U(iso) H4N Smaller than U(eq) N2 by ...          | 0.018 | AngSq  |        |    |      |      |
| PLAT250_ALERT_2_C | Large U3/U1 Ratio for Average U(i,j) Tensor .... | 3.0   | Note   |        |    |      |      |
| PLAT353_ALERT_3_C | Long N-H (N0.87,N1.01A)                          | N1    | -      | H1N    | .. | 1.05 | Ang. |
| PLAT353_ALERT_3_C | Long N-H (N0.87,N1.01A)                          | N1    | -      | H2N    | .. | 1.01 | Ang. |
| PLAT911_ALERT_3_C | Missing # FCF Refl Between THmin & STh/L=        | 0.595 | 24     | Report |    |      |      |
| PLAT978_ALERT_2_C | Number C-C Bonds with Positive Residual Density. | 0     | Info   |        |    |      |      |

---

**🟣 Alert level G**

|                   |                                                  |        |       |     |    |      |      |
|-------------------|--------------------------------------------------|--------|-------|-----|----|------|------|
| PLAT005_ALERT_5_G | No Embedded Refinement Details found in the CIF  | Please | Do !  |     |    |      |      |
| PLAT066_ALERT_1_G | Predicted and Reported Tmin&Tmax Range Identical | ?      | Check |     |    |      |      |
| PLAT244_ALERT_4_G | Low 'Solvent' Ueq as Compared to Neighbors of    | C19    | Check |     |    |      |      |
| PLAT244_ALERT_4_G | Low 'Solvent' Ueq as Compared to Neighbors of    | C38    | Check |     |    |      |      |
| PLAT300_ALERT_4_G | Atom Site Occupancy of C35A is Constrained at    | 0.5    | Check |     |    |      |      |
| PLAT300_ALERT_4_G | Atom Site Occupancy of C35B is Constrained at    | 0.5    | Check |     |    |      |      |
| PLAT300_ALERT_4_G | Atom Site Occupancy of H35A is Constrained at    | 0.5    | Check |     |    |      |      |
| PLAT300_ALERT_4_G | Atom Site Occupancy of H35B is Constrained at    | 0.5    | Check |     |    |      |      |
| PLAT300_ALERT_4_G | Atom Site Occupancy of H35C is Constrained at    | 0.5    | Check |     |    |      |      |
| PLAT300_ALERT_4_G | Atom Site Occupancy of H35D is Constrained at    | 0.5    | Check |     |    |      |      |
| PLAT300_ALERT_4_G | Atom Site Occupancy of F1A is Constrained at     | 0.8    | Check |     |    |      |      |
| PLAT300_ALERT_4_G | Atom Site Occupancy of F2A is Constrained at     | 0.8    | Check |     |    |      |      |
| PLAT300_ALERT_4_G | Atom Site Occupancy of F3A is Constrained at     | 0.8    | Check |     |    |      |      |
| PLAT300_ALERT_4_G | Atom Site Occupancy of F1B is Constrained at     | 0.2    | Check |     |    |      |      |
| PLAT300_ALERT_4_G | Atom Site Occupancy of F2B is Constrained at     | 0.2    | Check |     |    |      |      |
| PLAT300_ALERT_4_G | Atom Site Occupancy of F3B is Constrained at     | 0.2    | Check |     |    |      |      |
| PLAT300_ALERT_4_G | Atom Site Occupancy of F4A is Constrained at     | 0.65   | Check |     |    |      |      |
| PLAT300_ALERT_4_G | Atom Site Occupancy of F5A is Constrained at     | 0.65   | Check |     |    |      |      |
| PLAT300_ALERT_4_G | Atom Site Occupancy of F6A is Constrained at     | 0.65   | Check |     |    |      |      |
| PLAT300_ALERT_4_G | Atom Site Occupancy of F4B is Constrained at     | 0.35   | Check |     |    |      |      |
| PLAT300_ALERT_4_G | Atom Site Occupancy of F5B is Constrained at     | 0.35   | Check |     |    |      |      |
| PLAT300_ALERT_4_G | Atom Site Occupancy of F6B is Constrained at     | 0.35   | Check |     |    |      |      |
| PLAT301_ALERT_3_G | Main Residue Disorder .....(Resd 1)..            | 5%     | Note  |     |    |      |      |
| PLAT302_ALERT_4_G | Anion/Solvent/Minor-Residue Disorder (Resd 3)..  | 43%    | Note  |     |    |      |      |
| PLAT302_ALERT_4_G | Anion/Solvent/Minor-Residue Disorder (Resd 4)..  | 43%    | Note  |     |    |      |      |
| PLAT367_ALERT_2_G | Long? C(sp?)-C(sp?) Bond                         | C33    | -     | C34 | .. | 1.54 | Ang. |

|                   |                                                  |       |        |
|-------------------|--------------------------------------------------|-------|--------|
| PLAT764_ALERT_4_G | Overcomplete CIF Bond List Detected (Rep/Expd) . | 1.16  | Ratio  |
| PLAT779_ALERT_4_G | Suspect or Irrelevant (Bond) Angle in CIF .... # | 30    | Check  |
|                   | F2B -C19 -F2A 1.555 1.555 1.555                  | 35.80 | Deg.   |
| PLAT779_ALERT_4_G | Suspect or Irrelevant (Bond) Angle in CIF .... # | 36    | Check  |
|                   | F3B -C19 -F3A 1.555 1.555 1.555                  | 40.00 | Deg.   |
| PLAT779_ALERT_4_G | Suspect or Irrelevant (Bond) Angle in CIF .... # | 66    | Check  |
|                   | C35B -C34 -C35A 1.555 1.555 1.555                | 31.00 | Deg.   |
| PLAT779_ALERT_4_G | Suspect or Irrelevant (Bond) Angle in CIF .... # | 72    | Check  |
|                   | C35B -C36 -C35A 1.555 1.555 1.555                | 30.80 | Deg.   |
| PLAT779_ALERT_4_G | Suspect or Irrelevant (Bond) Angle in CIF .... # | 81    | Check  |
|                   | F4B -C38 -F4A 1.555 1.555 1.555                  | 22.90 | Deg.   |
| PLAT791_ALERT_4_G | The Model has Chirality at C14 (Chiral SPGR)     | S     | Verify |
| PLAT791_ALERT_4_G | The Model has Chirality at C33 (Chiral SPGR)     | S     | Verify |
| PLAT909_ALERT_3_G | Percentage of I>2sig(I) Data at Theta(Max) Still | 31%   | Note   |
| PLAT910_ALERT_3_G | Missing # of FCF Reflection(s) Below Theta(Min). | 3     | Note   |

---

2 **ALERT level A** = Most likely a serious problem - resolve or explain  
3 **ALERT level B** = A potentially serious problem, consider carefully  
20 **ALERT level C** = Check. Ensure it is not caused by an omission or oversight  
36 **ALERT level G** = General information/check it is not something unexpected

1 ALERT type 1 CIF construction/syntax error, inconsistent or missing data  
14 ALERT type 2 Indicator that the structure model may be wrong or deficient  
9 ALERT type 3 Indicator that the structure quality may be low  
36 ALERT type 4 Improvement, methodology, query or suggestion  
1 ALERT type 5 Informative message, check

---

It is advisable to attempt to resolve as many as possible of the alerts in all categories. Often the minor alerts point to easily fixed oversights, errors and omissions in your CIF or refinement strategy, so attention to these fine details can be worthwhile. In order to resolve some of the more serious problems it may be necessary to carry out additional measurements or structure refinements. However, the purpose of your study may justify the reported deviations and the more serious of these should normally be commented upon in the discussion or experimental section of a paper or in the "special\_details" fields of the CIF. checkCIF was carefully designed to identify outliers and unusual parameters, but every test has its limitations and alerts that are not important in a particular case may appear. Conversely, the absence of alerts does not guarantee there are no aspects of the results needing attention. It is up to the individual to critically assess their own results and, if necessary, seek expert advice.

### Publication of your CIF in IUCr journals

A basic structural check has been run on your CIF. These basic checks will be run on all CIFs submitted for publication in IUCr journals (*Acta Crystallographica*, *Journal of Applied Crystallography*, *Journal of Synchrotron Radiation*); however, if you intend to submit to *Acta Crystallographica Section C* or *E* or *IUCrData*, you should make sure that full publication checks are run on the final version of your CIF prior to submission.

### Publication of your CIF in other journals

Please refer to the *Notes for Authors* of the relevant journal for any special instructions relating to CIF submission.

Datablock 0800 - ellipsoid plot

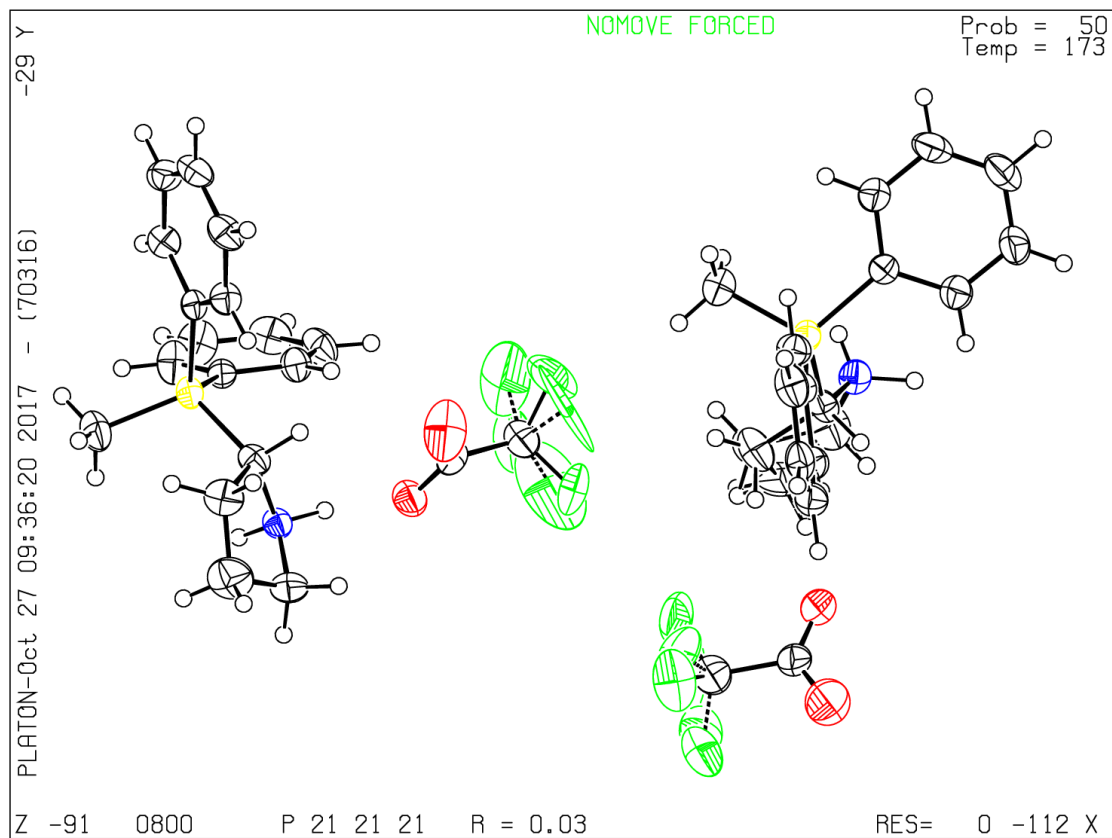

Supplement: s1 [file s1 › checkcif_1582444.pdf]
