# Supplementary material
Source: MDPI journal article supplement (https://www.mdpi.com/2304-6740/5/4/88)
Supplement: s1 [file s1]

Archive with 8 entries (8 files):
- ccdc_1582444.cif
- ccdc_1582445.cif
- ccdc_1582446.cif
- checkcif_1582443.pdf
- checkcif_1582444.pdf
- checkcif_1582445.pdf
- checkcif_1582446.pdf
- ccdc_1582443.cif
