# Supplementary material
Source: MDPI journal article supplement (https://www.mdpi.com/2304-6740/5/4/88)
Supplement: s1 [file s1 › ccdc_1582444.cif]

#\#CIF_1.1
 
#  CIF produced by WinGX routine CIF_UPDATE
#  Created on 2017-10-26 at 13:45:12
#  Using CIFtbx version 2.6.2 16 Jun 1998
 
#  Dictionary name : cif_core.dic
#  Dictionary vers : 2.4
#  Request file    : c:\program files\wingx\wingx\files\archive.reqdat
#  CIF files read  : 0800
 
#------------------ SECTION 1. GLOBAL INFORMATION ---------------------------#
 
data_global

_publ_section_comment
;
The Alert level A in the checkcif file results from disorder of the fluorine atoms
 within the trifluoroacetate anion.
;
#Added by publCIF
 
#------------------ AUDIT DETAILS -------------------------------------------#
 
_audit_creation_date            2017-10-26
_audit_creation_method          'WinGX routine CIF_UPDATE'
_audit_conform_dict_name        cif_core.dic
_audit_conform_dict_version     2.4
_audit_conform_dict_location    ftp://ftp.iucr.org/pub/cif_core.dic
_audit_update_record            
;
?

2017-10-26 # Formatted by publCIF
;

 
#==============================================================================
#
# SUBMISSION DETAILS
 
_publ_contact_author_name            
'Prof. Dr. Carsten Strohmann'
 
_publ_contact_author_address
;
Anorganische Chemie,
Fakult\"at f\"ur Chemie und Chemische Biologie,
Technische Universit\"at Dortmund,
Otto-Hahn-Strasse 6,
D-44227 Dortmund,
Germany
;
# Address of author for correspondence
 
_publ_contact_author_email           mail@carsten-strohmann.de
_publ_contact_author_fax             '0049 231 755 3797'
_publ_contact_author_phone           '0049 231 755 3807'
 
_publ_contact_letter
;
 
Please consider this CIF for submission to the Cambridge Crystallographic
Data Centre. I certify that all authors have seen and approved of this
submission, that all have made significant scientific contributions to the
work reported, and that all share responsibility and accountability for
the results.
 
This CIF is submitted as part of a journal submission
<Inorganics>
;
 
 
#==============================================================================
#
# TITLE AND AUTHOR LIST
 
_publ_section_title
;
Molecular Structures of Enantiomerically Pure (S)-2-(Triphenylsilyl)- and
(S)-2-(Methyldiphenylsilyl)pyrrolidinium Salts
;

_publ_section_title_footnote
.
 
# The loop structure below should contain the names and addresses of all
# authors, in the required order of publication. Repeat as necessary.
 
loop_
 _publ_author_name
 _publ_author_footnote
'Bauer, Jonathan O.'                  
;Institut f\"ur Anorganische Chemie,
Fakult\"at f\"ur Chemie und Pharmazie, 
Universit\"at Regensburg,
Universit\"atsstrasse 31, 
D-93053 Regensburg, 
Germany
;
'Strohmann, Carsten'                  
;Anorganische Chemie,
Fakult\"at f\"ur Chemie und Chemische Biologie,
Technische Universit\"at Dortmund,
Otto-Hahn-Strasse 6,
D-44227 Dortmund,
Germany
;
 
#------------------  SECTION 2. COMPOUND(S) DETAILS -------------------------#
 
data_0800
 
_audit_creation_date                    2017-10-26T13:45:12-00:00
_audit_creation_method                  'WinGX routine CIF_UPDATE'
 
#----------------------------------------------------------------------------#
#                   CHEMICAL INFORMATION                                     #
#----------------------------------------------------------------------------#
 
_chemical_name_systematic
?
_symmetry_cell_setting             orthorhombic
_symmetry_space_group_name_H-M     'P 21 21 21'
_symmetry_space_group_name_hall      'P 2ac 2ab'
_chemical_formula_moiety                'C17 H22 N Si, C2 F3 O2'
_chemical_formula_sum                   'C19 H22 F3 N O2 Si'
_chemical_formula_weight                381.47
_chemical_absolute_configuration        ad
 
#----------------------------------------------------------------------------#
#                   UNIT CELL INFORMATION                                    #
#----------------------------------------------------------------------------#
 
loop_
    _symmetry_equiv_pos_as_xyz
'x, y, z'
'-x+1/2, -y, z+1/2'
'x+1/2, -y+1/2, -z'
'-x, y+1/2, -z+1/2'
 
_cell_length_a                          9.5760(14)
_cell_length_b                          9.7100(17)
_cell_length_c                          41.176(4)
_cell_angle_alpha                       90
_cell_angle_beta                        90
_cell_angle_gamma                       90
_cell_volume                            3828.7(9)
_cell_formula_units_Z                   8
_cell_measurement_temperature           173(2)
_cell_measurement_reflns_used     6661
_cell_measurement_theta_min         2.18 
_cell_measurement_theta_max      25.00
 
#----------------------------------------------------------------------------#
#                   CRYSTAL INFORMATION                                      #
#----------------------------------------------------------------------------#

_exptl_crystal_description              needle
_exptl_crystal_colour                   colourless 
_exptl_crystal_size_max                 0.4
_exptl_crystal_size_mid                 0.2
_exptl_crystal_size_min                 0.2
_exptl_crystal_density_diffrn           1.324
_exptl_crystal_density_method           'not measured'
_exptl_crystal_F_000                    1600
_exptl_special_details
?
 
#----------------------------------------------------------------------------#
#                   ABSORPTION CORRECTION                                    #
#----------------------------------------------------------------------------#
 
_exptl_absorpt_coefficient_mu           0.163
_exptl_absorpt_correction_type          multi-scan
_exptl_absorpt_correction_T_min         0.938
_exptl_absorpt_correction_T_max         0.968
_exptl_absorpt_process_details
;
CrysAlis RED, Oxford Diffraction Ltd. Empirical absorption correction using
spherical harmonics, implemented in SCALE3 ABSPACK scaling algorithm.
;
 
#----------------------------------------------------------------------------#
#                   DATA COLLECTION                                          #
#----------------------------------------------------------------------------#
 
_diffrn_ambient_temperature             173(2)
_diffrn_radiation_wavelength            0.71073
_diffrn_radiation_type                  MoK\a
_diffrn_radiation_source          	'Enhance (Mo) X-ray Source'
_diffrn_radiation_monochromator         graphite
_diffrn_measurement_device_type   	'Xcalibur S Oxford Diffraction'
_diffrn_measurement_method        	Omega-scan
_diffrn_reflns_av_R_equivalents         0.0425
_diffrn_reflns_av_unetI/netI            0.0587
_diffrn_reflns_number                   41441
_diffrn_reflns_limit_h_min              -11
_diffrn_reflns_limit_h_max              11
_diffrn_reflns_limit_k_min              -11
_diffrn_reflns_limit_k_max              10
_diffrn_reflns_limit_l_min              -47
_diffrn_reflns_limit_l_max              48
_diffrn_reflns_theta_min                2.18
_diffrn_reflns_theta_max                25
_diffrn_reflns_theta_full               25
_diffrn_measured_fraction_theta_full
                                        0.993
_diffrn_measured_fraction_theta_max
                                        0.993
_reflns_number_total                    6661
_reflns_number_gt                       4893
_reflns_threshold_expression            >2sigma(I)
 
#----------------------------------------------------------------------------#
#                   COMPUTER PROGRAMS USED                                   #
#----------------------------------------------------------------------------#
 
_computing_data_collection
;
CrysAlis CCD, Oxford Diffraction Ltd.,
Version 1.171.32.37 (release 24-10-2008 CrysAlis171 .NET)
(compiled Oct 24 2008,09:44:38)
;

_computing_cell_refinement
;
CrysAlis RED, Oxford Diffraction Ltd.,
Version 1.171.32.37 (release 24-10-2008 CrysAlis171 .NET)
(compiled Oct 24 2008,09:44:38)'
;

_computing_data_reduction
;
CrysAlis RED, Oxford Diffraction Ltd.,
Version 1.171.32.37 (release 24-10-2008 CrysAlis171 .NET)
(compiled Oct 24 2008,09:44:38)
;

_computing_structure_solution     'SHELXS-97 (Sheldrick, 2008)'
_computing_structure_refinement   'SHELXL-97 (Sheldrick, 2008)'
_computing_molecular_graphics    
;
Ortep-3 (Farrugia, 1997)
;
_computing_publication_material   'wingx (Farrugia, 1999)'
 
#----------------------------------------------------------------------------#
#                   STRUCTURE SOLUTION
#----------------------------------------------------------------------------#
 
_atom_sites_solution_primary            direct
_atom_sites_solution_secondary          difmap
_atom_sites_solution_hydrogens          geom
 
#----------------------------------------------------------------------------#
#                   REFINEMENT INFORMATION                                   #
#----------------------------------------------------------------------------#
 
_refine_special_details
;
 Refinement of F^2^ against ALL reflections.  The weighted R-factor wR and
 goodness of fit S are based on F^2^, conventional R-factors R are based
 on F, with F set to zero for negative F^2^. The threshold expression of
 F^2^ > 2sigma(F^2^) is used only for calculating R-factors(gt) etc. and is
 not relevant to the choice of reflections for refinement.  R-factors based
 on F^2^ are statistically about twice as large as those based on F, and R-
 factors based on ALL data will be even larger.
;
_refine_ls_structure_factor_coef        Fsqd
_refine_ls_matrix_type                  full
_refine_ls_weighting_scheme             calc
_refine_ls_weighting_details
         'calc w=1/[\s^2^(Fo^2^)+(0.0246P)^2^+0.0000P] where P=(Fo^2^+2Fc^2^)/3'
_refine_ls_hydrogen_treatment           mixed
_refine_ls_extinction_method            none
_refine_ls_number_reflns                6661
_refine_ls_number_parameters            566
_refine_ls_number_restraints            0
_refine_ls_R_factor_all                 0.0539
_refine_ls_R_factor_gt                  0.034
_refine_ls_wR_factor_ref                0.0592
_refine_ls_wR_factor_gt                 0.0572
_refine_ls_goodness_of_fit_ref          1
_refine_ls_restrained_S_all             1
_refine_ls_shift/su_max                 0.001
_refine_ls_shift/su_mean                0
_refine_ls_abs_structure_details
                                    'Flack H D (1983), Acta Cryst. A39, 876-881'
_refine_ls_abs_structure_Flack          0.02(8)
_refine_diff_density_max                0.26
_refine_diff_density_min                -0.197
_refine_diff_density_rms                0.032
 
#----------------------------------------------------------------------------#
#                   ATOMIC TYPES, COORDINATES AND THERMAL PARAMETERS         #
#----------------------------------------------------------------------------#
 
loop_
    _atom_type_symbol
    _atom_type_description
    _atom_type_scat_dispersion_real
    _atom_type_scat_dispersion_imag
    _atom_type_scat_source
C C 0.0033 0.0016 'International Tables Vol C Tables 4.2.6.8 and 6.1.1.4'
H H 0 0 'International Tables Vol C Tables 4.2.6.8 and 6.1.1.4'
O O 0.0106 0.006 'International Tables Vol C Tables 4.2.6.8 and 6.1.1.4'
Si Si 0.0817 0.0704 'International Tables Vol C Tables 4.2.6.8 and 6.1.1.4'
F F 0.0171 0.0103 'International Tables Vol C Tables 4.2.6.8 and 6.1.1.4'
N N 0.0061 0.0033 'International Tables Vol C Tables 4.2.6.8 and 6.1.1.4'
 
loop_
    _atom_site_label
    _atom_site_type_symbol
    _atom_site_fract_x
    _atom_site_fract_y
    _atom_site_fract_z
    _atom_site_U_iso_or_equiv
    _atom_site_adp_type
    _atom_site_occupancy
    _atom_site_symmetry_multiplicity
    _atom_site_calc_flag
    _atom_site_refinement_flags
    _atom_site_disorder_assembly
    _atom_site_disorder_group
C1 C 0.6130(2) 0.3578(2) 0.15011(5) 0.0451(7) Uani 1 1 d . . .
H1A H 0.6942 0.3292 0.1373 0.068 Uiso 1 1 calc R . .
H1B H 0.552 0.4157 0.1367 0.068 Uiso 1 1 calc R . .
H1C H 0.5615 0.2762 0.1573 0.068 Uiso 1 1 calc R . .
C2 C 0.7698(2) 0.6148(2) 0.17397(5) 0.0277(5) Uani 1 1 d . . .
C3 C 0.9036(2) 0.6027(2) 0.16159(5) 0.0351(6) Uani 1 1 d . . .
H3 H 0.9444 0.5138 0.1598 0.042 Uiso 1 1 calc R . .
C4 C 0.9795(3) 0.7162(3) 0.15178(5) 0.0413(6) Uani 1 1 d . . .
H4 H 1.0708 0.7046 0.1432 0.05 Uiso 1 1 calc R . .
C5 C 0.9235(3) 0.8452(3) 0.15441(6) 0.0421(7) Uani 1 1 d . . .
H5 H 0.9752 0.9236 0.1476 0.05 Uiso 1 1 calc R . .
C6 C 0.7929(3) 0.8599(2) 0.16681(6) 0.0410(6) Uani 1 1 d . . .
H6 H 0.7533 0.9492 0.1687 0.049 Uiso 1 1 calc R . .
C7 C 0.7171(2) 0.7467(2) 0.17667(5) 0.0337(6) Uani 1 1 d . . .
H7 H 0.6264 0.7597 0.1855 0.04 Uiso 1 1 calc R . .
C8 C 0.7892(2) 0.3491(2) 0.21143(5) 0.0291(6) Uani 1 1 d . . .
C9 C 0.8619(3) 0.2375(2) 0.19897(6) 0.0446(7) Uani 1 1 d . . .
H9 H 0.8465 0.2111 0.177 0.053 Uiso 1 1 calc R . .
C10 C 0.9558(3) 0.1638(3) 0.21739(7) 0.0539(7) Uani 1 1 d . . .
H10 H 1.0044 0.0883 0.208 0.065 Uiso 1 1 calc R . .
C11 C 0.9792(3) 0.1984(3) 0.24890(7) 0.0461(7) Uani 1 1 d . . .
H11 H 1.0444 0.1481 0.2616 0.055 Uiso 1 1 calc R . .
C12 C 0.9072(3) 0.3073(3) 0.26206(6) 0.0455(7) Uani 1 1 d . . .
H12 H 0.9209 0.3309 0.2842 0.055 Uiso 1 1 calc R . .
C13 C 0.8157(2) 0.3824(2) 0.24352(5) 0.0358(6) Uani 1 1 d . . .
H13 H 0.7695 0.4592 0.2529 0.043 Uiso 1 1 calc R . .
C14 C 0.5161(2) 0.5143(2) 0.21045(5) 0.0322(6) Uani 1 1 d . . .
H14 H 0.5475 0.59 0.2252 0.039 Uiso 1 1 calc R . .
C15 C 0.3907(2) 0.5690(3) 0.19055(6) 0.0452(7) Uani 1 1 d . . .
H15A H 0.3746 0.6677 0.1952 0.054 Uiso 1 1 calc R . .
H15B H 0.4081 0.5579 0.167 0.054 Uiso 1 1 calc R . .
C16 C 0.2681(3) 0.4856(3) 0.20072(6) 0.0620(8) Uani 1 1 d . . .
H16A H 0.1829 0.5433 0.2013 0.074 Uiso 1 1 calc R . .
H16B H 0.2527 0.4086 0.1854 0.074 Uiso 1 1 calc R . .
C17 C 0.3007(2) 0.4323(3) 0.23349(5) 0.0445(6) Uani 1 1 d . . .
H17A H 0.2469 0.3476 0.2383 0.053 Uiso 1 1 calc R . .
H17B H 0.2808 0.502 0.2504 0.053 Uiso 1 1 calc R . .
C18 C 0.5848(2) 0.5268(3) 0.30314(5) 0.0351(6) Uani 1 1 d . . .
C19 C 0.6525(3) 0.5249(3) 0.33652(7) 0.0484(7) Uani 1 1 d . . .
C20 C 0.8337(2) 0.8959(2) 0.39682(5) 0.0481(7) Uani 1 1 d . . .
H20A H 0.8507 0.9809 0.3846 0.072 Uiso 1 1 calc R . .
H20B H 0.7791 0.8321 0.3834 0.072 Uiso 1 1 calc R . .
H20C H 0.9231 0.8532 0.4025 0.072 Uiso 1 1 calc R . .
C21 C 0.8409(2) 1.0507(2) 0.46061(5) 0.0296(5) Uani 1 1 d . . .
C22 C 0.9517(2) 1.1288(3) 0.44945(6) 0.0450(7) Uani 1 1 d . . .
H22 H 0.9788 1.1212 0.4273 0.054 Uiso 1 1 calc R . .
C23 C 1.0232(3) 1.2164(3) 0.46926(7) 0.0535(8) Uani 1 1 d . . .
H23 H 1.0988 1.2685 0.4608 0.064 Uiso 1 1 calc R . .
C24 C 0.9875(3) 1.2301(3) 0.50110(7) 0.0509(7) Uani 1 1 d . . .
H24 H 1.0381 1.2909 0.5148 0.061 Uiso 1 1 calc R . .
C25 C 0.8780(3) 1.1551(3) 0.51310(6) 0.0516(7) Uani 1 1 d . . .
H25 H 0.8518 1.1639 0.5353 0.062 Uiso 1 1 calc R . .
C26 C 0.8063(2) 1.0676(2) 0.49311(5) 0.0420(6) Uani 1 1 d . . .
H26 H 0.7303 1.0166 0.5018 0.05 Uiso 1 1 calc R . .
C27 C 0.5703(2) 1.0251(2) 0.42430(5) 0.0286(5) Uani 1 1 d . . .
C28 C 0.5740(3) 1.1510(2) 0.40776(5) 0.0389(6) Uani 1 1 d . . .
H28 H 0.6618 1.1891 0.4018 0.047 Uiso 1 1 calc R . .
C29 C 0.4531(3) 1.2212(2) 0.39981(6) 0.0449(7) Uani 1 1 d . . .
H29 H 0.4585 1.3067 0.3887 0.054 Uiso 1 1 calc R . .
C30 C 0.3253(3) 1.1676(2) 0.40796(5) 0.0397(6) Uani 1 1 d . . .
H30 H 0.2422 1.215 0.4021 0.048 Uiso 1 1 calc R . .
C31 C 0.3181(2) 1.0462(2) 0.42446(5) 0.0380(6) Uani 1 1 d . . .
H31 H 0.2298 1.0097 0.4306 0.046 Uiso 1 1 calc R . .
C32 C 0.4392(2) 0.9759(2) 0.43230(5) 0.0337(6) Uani 1 1 d . . .
H32 H 0.4321 0.8908 0.4436 0.04 Uiso 1 1 calc R . .
C33 C 0.6863(2) 0.7748(2) 0.45679(5) 0.0318(6) Uani 1 1 d . . .
H33 H 0.6065 0.7987 0.4714 0.038 Uiso 1 1 calc R . .
C34 C 0.6387(4) 0.6540(3) 0.43534(8) 0.0550(8) Uani 1 1 d . . .
C35A C 0.7166(8) 0.5295(10) 0.4453(2) 0.057(2) Uani 0.5 1 d P . .
H35A H 0.7949 0.5115 0.4302 0.068 Uiso 0.5 1 calc PR . .
H35B H 0.6544 0.448 0.4455 0.068 Uiso 0.5 1 calc PR . .
C35B C 0.6533(8) 0.5358(9) 0.4575(2) 0.060(2) Uani 0.5 1 d P . .
H35C H 0.5667 0.5241 0.4703 0.073 Uiso 0.5 1 calc PR . .
H35D H 0.6692 0.4506 0.4448 0.073 Uiso 0.5 1 calc PR . .
C36 C 0.7706(4) 0.5603(3) 0.47904(8) 0.0588(8) Uani 1 1 d . . .
C37 C 0.1786(3) 0.6846(2) 0.44865(6) 0.0435(7) Uani 1 1 d . . .
C38 C 0.1657(4) 0.6011(3) 0.41751(7) 0.0502(7) Uani 1 1 d . . .
F1A F 0.7164(4) 0.4078(4) 0.34328(9) 0.0799(11) Uani 0.8 1 d P . .
F1B F 0.7845(16) 0.513(5) 0.3305(4) 0.175(11) Uani 0.2 1 d P . .
F2A F 0.7395(8) 0.6241(7) 0.34224(12) 0.111(2) Uani 0.8 1 d P . .
F2B F 0.663(3) 0.646(3) 0.3465(8) 0.168(15) Uani 0.2 1 d P . .
F3A F 0.5563(3) 0.5351(4) 0.35951(7) 0.0630(10) Uani 0.8 1 d P . .
F3B F 0.602(5) 0.459(4) 0.3559(5) 0.35(3) Uani 0.2 1 d P . .
F4A F 0.1034(8) 0.6626(6) 0.39358(16) 0.081(2) Uani 0.65 1 d P . .
F4B F 0.1516(18) 0.6849(14) 0.3939(3) 0.114(6) Uani 0.35 1 d P . .
F5A F 0.2933(5) 0.5708(5) 0.40372(12) 0.0796(16) Uani 0.65 1 d P . .
F5B F 0.2321(15) 0.5013(13) 0.4143(2) 0.140(7) Uani 0.35 1 d P . .
F6A F 0.1071(7) 0.4837(5) 0.42236(10) 0.0932(18) Uani 0.65 1 d P . .
F6B F 0.0211(7) 0.5582(11) 0.41588(19) 0.101(3) Uani 0.35 1 d P . .
H1N H 0.501(2) 0.399(2) 0.2542(6) 0.058(7) Uiso 1 1 d . . .
H2N H 0.465(2) 0.308(3) 0.2217(5) 0.058(8) Uiso 1 1 d . . .
H3N H 0.789(3) 0.750(3) 0.5022(8) 0.100(10) Uiso 1 1 d . . .
H4N H 0.877(2) 0.725(2) 0.4690(4) 0.018(6) Uiso 1 1 d . . .
H34A H 0.533(4) 0.649(3) 0.4350(8) 0.130(14) Uiso 1 1 d . . .
H34B H 0.639(3) 0.671(3) 0.4147(8) 0.104(14) Uiso 1 1 d . . .
H36A H 0.707(4) 0.548(4) 0.4976(9) 0.150(16) Uiso 1 1 d . . .
H36B H 0.863(3) 0.517(3) 0.4787(6) 0.082(10) Uiso 1 1 d . . .
N1 N 0.4532(2) 0.4030(2) 0.23124(5) 0.0303(5) Uani 1 1 d . . .
N2 N 0.7983(2) 0.7112(2) 0.47766(5) 0.0364(5) Uani 1 1 d . . .
O1 O 0.54933(17) 0.41311(17) 0.29324(4) 0.0478(4) Uani 1 1 d . . .
O2 O 0.5759(2) 0.63702(18) 0.28980(5) 0.0786(7) Uani 1 1 d . . .
O3 O 0.2965(2) 0.69359(18) 0.45968(4) 0.0506(5) Uani 1 1 d . . .
O4 O 0.0718(2) 0.7308(2) 0.45965(5) 0.0922(8) Uani 1 1 d . . .
Si1 Si 0.67225(6) 0.45678(6) 0.185932(14) 0.02979(16) Uani 1 1 d . . .
Si2 Si 0.73594(6) 0.93630(6) 0.434220(14) 0.03161(16) Uani 1 1 d . . .
 
loop_
    _atom_site_aniso_label
    _atom_site_aniso_U_11
    _atom_site_aniso_U_22
    _atom_site_aniso_U_33
    _atom_site_aniso_U_23
    _atom_site_aniso_U_13
    _atom_site_aniso_U_12
C1 0.0630(18) 0.0393(15) 0.0332(13) -0.0007(12) -0.0094(13) -0.0042(13)
C2 0.0310(14) 0.0295(13) 0.0225(11) -0.0008(9) -0.0026(11) 0.0003(12)
C3 0.0359(15) 0.0327(14) 0.0367(14) 0.0021(11) -0.0039(12) 0.0010(12)
C4 0.0352(15) 0.0512(17) 0.0374(14) 0.0054(13) -0.0025(12) -0.0064(14)
C5 0.0460(18) 0.0400(17) 0.0402(15) 0.0078(12) -0.0140(14) -0.0155(14)
C6 0.0493(18) 0.0252(14) 0.0483(15) 0.0011(12) -0.0104(14) -0.0028(13)
C7 0.0396(15) 0.0276(14) 0.0339(13) 0.0011(10) -0.0009(11) 0.0006(13)
C8 0.0338(15) 0.0260(13) 0.0274(12) 0.0009(10) 0.0011(11) -0.0030(11)
C9 0.0653(18) 0.0322(15) 0.0362(14) 0.0010(12) -0.0019(14) 0.0102(14)
C10 0.065(2) 0.0398(16) 0.0570(18) 0.0048(14) 0.0014(16) 0.0201(15)
C11 0.0423(17) 0.0402(16) 0.0558(17) 0.0135(14) -0.0134(14) 0.0065(13)
C12 0.0549(18) 0.0432(17) 0.0383(15) 0.0062(13) -0.0179(14) -0.0070(15)
C13 0.0393(15) 0.0349(13) 0.0332(13) -0.0004(11) -0.0030(12) 0.0025(12)
C14 0.0372(14) 0.0245(12) 0.0349(12) 0.0035(11) -0.0048(12) -0.0031(11)
C15 0.0423(16) 0.0417(15) 0.0517(16) 0.0065(13) -0.0053(13) 0.0037(14)
C16 0.0450(17) 0.073(2) 0.0684(19) 0.0065(16) -0.0120(15) 0.0080(16)
C17 0.0296(15) 0.0527(16) 0.0512(16) -0.0011(13) 0.0021(12) -0.0037(14)
C18 0.0420(16) 0.0305(15) 0.0326(14) 0.0021(12) 0.0088(12) 0.0036(13)
C19 0.051(2) 0.047(2) 0.0480(18) -0.0060(16) -0.0057(16) -0.0053(19)
C20 0.0490(16) 0.0565(17) 0.0387(14) -0.0051(12) 0.0059(13) -0.0016(14)
C21 0.0282(13) 0.0287(12) 0.0320(12) -0.0004(11) -0.0003(11) 0.0028(12)
C22 0.0396(16) 0.0604(18) 0.0350(14) -0.0037(13) 0.0013(13) -0.0064(15)
C23 0.0415(17) 0.0611(19) 0.0580(19) -0.0015(16) -0.0077(15) -0.0205(15)
C24 0.0460(18) 0.0456(17) 0.0612(18) -0.0188(15) -0.0117(15) -0.0046(15)
C25 0.0482(19) 0.0604(18) 0.0463(16) -0.0230(15) 0.0012(14) -0.0026(15)
C26 0.0390(15) 0.0439(15) 0.0430(14) -0.0098(13) 0.0036(12) -0.0002(13)
C27 0.0318(14) 0.0324(14) 0.0217(11) -0.0061(10) -0.0014(10) -0.0038(12)
C28 0.0381(16) 0.0414(15) 0.0370(14) 0.0046(12) -0.0035(13) -0.0072(13)
C29 0.0586(19) 0.0385(15) 0.0375(15) 0.0022(12) -0.0151(14) 0.0083(16)
C30 0.0388(17) 0.0468(16) 0.0336(13) -0.0098(12) -0.0082(13) 0.0116(14)
C31 0.0308(15) 0.0453(15) 0.0380(13) -0.0023(13) -0.0040(11) 0.0048(14)
C32 0.0363(15) 0.0331(13) 0.0317(13) 0.0011(11) -0.0023(12) 0.0006(12)
C33 0.0268(13) 0.0333(13) 0.0353(12) -0.0081(11) -0.0070(11) 0.0072(12)
C34 0.068(3) 0.0422(18) 0.055(2) -0.0110(16) -0.0158(18) -0.0038(17)
C35A 0.050(6) 0.042(4) 0.078(6) -0.026(4) 0.003(4) 0.000(5)
C35B 0.059(6) 0.034(4) 0.088(7) 0.010(5) 0.009(4) -0.014(5)
C36 0.075(2) 0.0330(16) 0.068(2) 0.0011(16) -0.008(2) 0.0093(18)
C37 0.0499(19) 0.0403(16) 0.0403(16) -0.0002(13) 0.0083(16) -0.0121(16)
C38 0.063(2) 0.044(2) 0.0433(19) 0.0075(15) -0.0037(18) -0.007(2)
F1A 0.091(3) 0.091(2) 0.057(2) -0.0128(16) -0.0323(19) 0.058(2)
F1B 0.055(9) 0.38(4) 0.092(11) -0.064(18) -0.041(8) 0.063(16)
F2A 0.123(5) 0.125(4) 0.085(2) -0.009(3) -0.022(3) -0.081(4)
F2B 0.18(3) 0.126(16) 0.19(2) -0.122(16) -0.14(2) 0.043(18)
F3A 0.0834(18) 0.076(2) 0.0292(12) -0.0027(14) 0.0122(12) 0.017(2)
F3B 0.67(7) 0.28(3) 0.090(15) 0.08(2) -0.04(3) -0.38(4)
F4A 0.107(5) 0.067(3) 0.070(3) -0.010(2) -0.022(3) 0.035(4)
F4B 0.132(11) 0.183(11) 0.027(4) 0.031(5) 0.016(5) -0.050(7)
F5A 0.073(2) 0.112(4) 0.054(2) -0.033(2) 0.0114(18) 0.017(3)
F5B 0.219(18) 0.111(11) 0.089(10) -0.057(7) -0.042(10) 0.125(13)
F6A 0.156(5) 0.048(3) 0.076(2) -0.013(2) 0.023(4) -0.041(3)
F6B 0.098(6) 0.118(7) 0.086(5) -0.049(5) -0.003(4) -0.030(5)
N1 0.0362(13) 0.0258(12) 0.0290(11) 0.0019(9) -0.0025(10) -0.0029(10)
N2 0.0333(15) 0.0395(13) 0.0364(13) -0.0009(10) -0.0013(11) 0.0074(11)
O1 0.0639(12) 0.0434(11) 0.0360(10) 0.0046(8) -0.0044(9) -0.0181(9)
O2 0.144(2) 0.0336(11) 0.0579(13) 0.0094(10) 0.0022(13) 0.0195(12)
O3 0.0545(13) 0.0563(12) 0.0411(10) 0.0000(8) 0.0057(10) -0.0114(10)
O4 0.0479(13) 0.126(2) 0.1024(17) -0.0522(15) 0.0160(13) 0.0081(14)
Si1 0.0388(4) 0.0253(3) 0.0253(3) -0.0002(3) -0.0026(3) -0.0006(3)
Si2 0.0312(4) 0.0364(4) 0.0273(3) -0.0036(3) -0.0002(3) 0.0008(3)
 
 
#----------------------------------------------------------------------------#
#                   MOLECULAR GEOMETRY                                       #
#----------------------------------------------------------------------------#
 
_geom_special_details
;
 All esds (except the esd in the dihedral angle between two l.s. planes)
 are estimated using the full covariance matrix.  The cell esds are taken
 into account individually in the estimation of esds in distances, angles
 and torsion angles; correlations between esds in cell parameters are only
 used when they are defined by crystal symmetry.  An approximate (isotropic)
 treatment of cell esds is used for estimating esds involving l.s. planes.
;
loop_
    _geom_bond_atom_site_label_1
    _geom_bond_atom_site_label_2
    _geom_bond_distance
    _geom_bond_site_symmetry_2
    _geom_bond_publ_flag
C1 Si1 1.849(2) . ?
C2 C7 1.382(3) . ?
C2 C3 1.384(3) . ?
C2 Si1 1.863(2) . ?
C3 C4 1.380(3) . ?
C4 C5 1.367(3) . ?
C5 C6 1.359(3) . ?
C6 C7 1.378(3) . ?
C8 C13 1.384(3) . ?
C8 C9 1.387(3) . ?
C8 Si1 1.857(2) . ?
C9 C10 1.377(3) . ?
C10 C11 1.359(3) . ?
C11 C12 1.373(3) . ?
C12 C13 1.372(3) . ?
C14 N1 1.505(2) . ?
C14 C15 1.547(3) . ?
C14 Si1 1.889(2) . ?
C15 C16 1.486(3) . ?
C16 C17 1.478(3) . ?
C17 N1 1.491(3) . ?
C18 O2 1.206(3) . ?
C18 O1 1.225(3) . ?
C18 C19 1.520(3) . ?
C19 F3B 1.132(18) . ?
C19 F2B 1.25(2) . ?
C19 F1B 1.294(14) . ?
C19 F2A 1.295(5) . ?
C19 F1A 1.321(4) . ?
C19 F3A 1.325(4) . ?
C20 Si2 1.845(2) . ?
C21 C22 1.383(3) . ?
C21 C26 1.388(3) . ?
C21 Si2 1.850(2) . ?
C22 C23 1.363(3) . ?
C23 C24 1.361(3) . ?
C24 C25 1.369(3) . ?
C25 C26 1.368(3) . ?
C27 C32 1.383(3) . ?
C27 C28 1.400(3) . ?
C27 Si2 1.851(2) . ?
C28 C29 1.383(3) . ?
C29 C30 1.371(3) . ?
C30 C31 1.363(3) . ?
C31 C32 1.384(3) . ?
C33 N2 1.507(3) . ?
C33 C34 1.537(3) . ?
C33 Si2 1.884(2) . ?
C34 C35B 1.472(10) . ?
C34 C35A 1.479(10) . ?
C35A C36 1.514(9) . ?
C35B C36 1.452(9) . ?
C36 N2 1.491(3) . ?
C37 O4 1.205(3) . ?
C37 O3 1.220(3) . ?
C37 C38 1.522(3) . ?
C38 F5B 1.166(8) . ?
C38 F4B 1.274(13) . ?
C38 F6A 1.286(4) . ?
C38 F4A 1.298(7) . ?
C38 F5A 1.378(6) . ?
C38 F6B 1.448(8) . ?
F1A F3B 1.31(6) . ?
F1A F1B 1.32(4) . ?
F1B F2A 1.26(3) . ?
F2A F2B 0.78(3) . ?
F2B F3A 1.58(4) . ?
F3A F3B 0.87(6) . ?
F4A F4B 0.51(2) . ?
F4A F6B 1.578(11) . ?
F5A F5B 0.995(16) . ?
F5B F6A 1.254(13) . ?
F6A F6B 1.128(7) . ?
 
loop_
    _geom_angle_atom_site_label_1
    _geom_angle_atom_site_label_2
    _geom_angle_atom_site_label_3
    _geom_angle
    _geom_angle_site_symmetry_1
    _geom_angle_site_symmetry_3
    _geom_angle_publ_flag
C7 C2 C3 116.5(2) . . ?
C7 C2 Si1 124.00(17) . . ?
C3 C2 Si1 119.48(16) . . ?
C4 C3 C2 121.8(2) . . ?
C5 C4 C3 120.1(2) . . ?
C6 C5 C4 119.1(2) . . ?
C5 C6 C7 120.8(2) . . ?
C6 C7 C2 121.5(2) . . ?
C13 C8 C9 116.3(2) . . ?
C13 C8 Si1 121.24(16) . . ?
C9 C8 Si1 122.26(17) . . ?
C10 C9 C8 122.1(2) . . ?
C11 C10 C9 120.3(2) . . ?
C10 C11 C12 119.0(2) . . ?
C13 C12 C11 120.7(2) . . ?
C12 C13 C8 121.6(2) . . ?
N1 C14 C15 103.73(17) . . ?
N1 C14 Si1 114.11(14) . . ?
C15 C14 Si1 115.65(15) . . ?
C16 C15 C14 106.07(18) . . ?
C17 C16 C15 106.3(2) . . ?
C16 C17 N1 102.52(19) . . ?
O2 C18 O1 128.9(2) . . ?
O2 C18 C19 116.9(3) . . ?
O1 C18 C19 114.1(2) . . ?
F3B C19 F2B 109.5(19) . . ?
F3B C19 F1B 120(2) . . ?
F2B C19 F1B 94.1(16) . . ?
F3B C19 F2A 124.5(11) . . ?
F2B C19 F2A 35.8(14) . . ?
F1B C19 F2A 58.4(16) . . ?
F3B C19 F1A 64(3) . . ?
F2B C19 F1A 134.8(9) . . ?
F1B C19 F1A 60.6(18) . . ?
F2A C19 F1A 107.7(4) . . ?
F3B C19 F3A 40(3) . . ?
F2B C19 F3A 75.6(19) . . ?
F1B C19 F3A 145.5(7) . . ?
F2A C19 F3A 105.2(4) . . ?
F1A C19 F3A 103.7(3) . . ?
F3B C19 C18 117.5(14) . . ?
F2B C19 C18 108.6(12) . . ?
F1B C19 C18 104.1(7) . . ?
F2A C19 C18 115.4(3) . . ?
F1A C19 C18 113.5(3) . . ?
F3A C19 C18 110.4(3) . . ?
C22 C21 C26 116.0(2) . . ?
C22 C21 Si2 123.42(17) . . ?
C26 C21 Si2 120.51(18) . . ?
C23 C22 C21 121.9(2) . . ?
C24 C23 C22 120.8(3) . . ?
C23 C24 C25 119.2(2) . . ?
C26 C25 C24 119.8(2) . . ?
C25 C26 C21 122.3(2) . . ?
C32 C27 C28 116.1(2) . . ?
C32 C27 Si2 124.35(16) . . ?
C28 C27 Si2 119.51(18) . . ?
C29 C28 C27 121.6(2) . . ?
C30 C29 C28 120.2(2) . . ?
C31 C30 C29 119.7(2) . . ?
C30 C31 C32 120.0(2) . . ?
C27 C32 C31 122.3(2) . . ?
N2 C33 C34 103.12(18) . . ?
N2 C33 Si2 116.28(15) . . ?
C34 C33 Si2 115.23(18) . . ?
C35B C34 C35A 31.0(3) . . ?
C35B C34 C33 102.2(4) . . ?
C35A C34 C33 108.4(4) . . ?
C34 C35A C36 105.4(5) . . ?
C36 C35B C34 108.9(6) . . ?
C35B C36 N2 106.0(4) . . ?
C35B C36 C35A 30.8(3) . . ?
N2 C36 C35A 102.7(4) . . ?
O4 C37 O3 128.2(2) . . ?
O4 C37 C38 116.5(3) . . ?
O3 C37 C38 115.2(3) . . ?
F5B C38 F4B 120.2(9) . . ?
F5B C38 F6A 61.3(7) . . ?
F4B C38 F6A 129.7(8) . . ?
F5B C38 F4A 123.3(6) . . ?
F4B C38 F4A 22.9(10) . . ?
F6A C38 F4A 109.0(5) . . ?
F5B C38 F5A 45.1(8) . . ?
F4B C38 F5A 85.2(7) . . ?
F6A C38 F5A 105.2(4) . . ?
F4A C38 F5A 101.1(4) . . ?
F5B C38 F6B 106.1(8) . . ?
F4B C38 F6B 92.7(8) . . ?
F6A C38 F6B 48.3(3) . . ?
F4A C38 F6B 69.9(5) . . ?
F5A C38 F6B 140.1(4) . . ?
F5B C38 C37 119.5(5) . . ?
F4B C38 C37 108.0(7) . . ?
F6A C38 C37 112.1(3) . . ?
F4A C38 C37 115.6(3) . . ?
F5A C38 C37 112.9(4) . . ?
F6B C38 C37 105.6(4) . . ?
F3B F1A F1B 106.2(12) . . ?
F3B F1A C19 50.9(11) . . ?
F1B F1A C19 58.7(9) . . ?
F2A F1B C19 60.9(9) . . ?
F2A F1B F1A 109.8(12) . . ?
C19 F1B F1A 60.7(13) . . ?
F2B F2A F1B 130(2) . . ?
F2B F2A C19 69.2(19) . . ?
F1B F2A C19 60.8(11) . . ?
F2A F2B C19 75.0(18) . . ?
F2A F2B F3A 119(3) . . ?
C19 F2B F3A 54.2(14) . . ?
F3B F3A C19 57.8(16) . . ?
F3B F3A F2B 101(2) . . ?
C19 F3A F2B 50.2(9) . . ?
F3A F3B C19 82(2) . . ?
F3A F3B F1A 144(2) . . ?
C19 F3B F1A 65(2) . . ?
F4B F4A C38 76(2) . . ?
F4B F4A F6B 135(2) . . ?
C38 F4A F6B 59.5(4) . . ?
F4A F4B C38 81.2(19) . . ?
F5B F5A C38 56.1(6) . . ?
F5A F5B C38 78.9(10) . . ?
F5A F5B F6A 140.4(12) . . ?
C38 F5B F6A 64.1(6) . . ?
F6B F6A F5B 123.2(9) . . ?
F6B F6A C38 73.4(5) . . ?
F5B F6A C38 54.6(5) . . ?
F6A F6B C38 58.3(4) . . ?
F6A F6B F4A 100.7(6) . . ?
C38 F6B F4A 50.6(4) . . ?
C17 N1 C14 106.85(17) . . ?
C36 N2 C33 107.3(2) . . ?
C1 Si1 C8 110.07(10) . . ?
C1 Si1 C2 111.77(10) . . ?
C8 Si1 C2 108.11(9) . . ?
C1 Si1 C14 109.69(10) . . ?
C8 Si1 C14 109.98(9) . . ?
C2 Si1 C14 107.16(10) . . ?
C20 Si2 C21 110.03(11) . . ?
C20 Si2 C27 110.46(10) . . ?
C21 Si2 C27 108.38(9) . . ?
C20 Si2 C33 111.26(11) . . ?
C21 Si2 C33 110.30(9) . . ?
C27 Si2 C33 106.30(10) . . ?
 
# The following lines are used to test the character set of files sent by
# network email or other means. They are not part of the CIF data set
# abcdefghijklmnopqrstuvwxyzABCDEFGHIJKLMNOPQRSTUVWXYZ0123456789
# !@#$%^&*()_+{}:"~<>?|\-=[];'`,./
 
# END of CIF
