# Supplementary material
Source: MDPI journal article supplement (https://www.mdpi.com/2304-6740/5/4/88)
Supplement: s1 [file s1 › ccdc_1582445.cif]

#\#CIF_1.1
 
#  CIF produced by WinGX routine CIF_UPDATE
#  Created on 2017-10-26 at 13:46:56
#  Using CIFtbx version 2.6.2 16 Jun 1998
 
#  Dictionary name : cif_core.dic
#  Dictionary vers : 2.4
#  Request file    : c:\program files\wingx\wingx\files\archive.reqdat
#  CIF files read  : 1529
 
#------------------ SECTION 1. GLOBAL INFORMATION ---------------------------#
 
data_global
 
#------------------ AUDIT DETAILS -------------------------------------------#
 
_audit_creation_date            2017-10-26
_audit_creation_method          'WinGX routine CIF_UPDATE'
_audit_conform_dict_name        cif_core.dic
_audit_conform_dict_version     2.4
_audit_conform_dict_location    ftp://ftp.iucr.org/pub/cif_core.dic
_audit_update_record            
;
?

2017-10-26 # Formatted by publCIF
;

 
#==============================================================================
#
# SUBMISSION DETAILS
 
_publ_contact_author_name            
'Prof. Dr. Carsten Strohmann'
 
_publ_contact_author_address
;
Anorganische Chemie,
Fakult\"at f\"ur Chemie und Chemische Biologie,
Technische Universit\"at Dortmund,
Otto-Hahn-Strasse 6,
D-44227 Dortmund,
Germany
;
# Address of author for correspondence
 
_publ_contact_author_email           mail@carsten-strohmann.de
_publ_contact_author_fax             '0049 231 755 3797'
_publ_contact_author_phone           '0049 231 755 3807'
 
_publ_contact_letter
;
 
Please consider this CIF for submission to the Cambridge Crystallographic
Data Centre. I certify that all authors have seen and approved of this
submission, that all have made significant scientific contributions to the
work reported, and that all share responsibility and accountability for
the results.
 
This CIF is submitted as part of a journal submission
<Inorganics>
;
 
 
#==============================================================================
#
# TITLE AND AUTHOR LIST
 
_publ_section_title
;
Molecular Structures of Enantiomerically Pure (S)-2-(Triphenylsilyl)- and
 (S)-2-(Methyldiphenylsilyl)pyrrolidinium Salts
;

_publ_section_title_footnote
.
 
# The loop structure below should contain the names and addresses of all
# authors, in the required order of publication. Repeat as necessary.
 
loop_
 _publ_author_name
 _publ_author_footnote
'Bauer, Jonathan O.'                  
;Institut f\"ur Anorganische Chemie,
Fakult\"at f\"ur Chemie und Pharmazie, 
Universit\"at Regensburg,
Universit\"atsstrasse 31, 
D-93053 Regensburg, 
Germany
;
'Strohmann, Carsten'                  
;Anorganische Chemie,
Fakult\"at f\"ur Chemie und Chemische Biologie,
Technische Universit\"at Dortmund,
Otto-Hahn-Strasse 6,
D-44227 Dortmund,
Germany
;
 
#------------------  SECTION 2. COMPOUND(S) DETAILS -------------------------#
 
data_1529
 
_audit_creation_date                    2017-10-26T13:46:56-00:00
_audit_creation_method                  'WinGX routine CIF_UPDATE'
 
#----------------------------------------------------------------------------#
#                   CHEMICAL INFORMATION                                     #
#----------------------------------------------------------------------------#
 
_chemical_name_systematic
?
_symmetry_cell_setting             monoclinic
_symmetry_space_group_name_H-M     'P 21'
_symmetry_space_group_name_hall      'P 2yb'
_chemical_formula_moiety                'C22 H24 N Si, Cl O4'
_chemical_formula_sum                   'C22 H24 Cl N O4 Si'
_chemical_formula_weight                429.96
_chemical_absolute_configuration        ad
 
#----------------------------------------------------------------------------#
#                   UNIT CELL INFORMATION                                    #
#----------------------------------------------------------------------------#
 
loop_
    _symmetry_equiv_pos_as_xyz
'x, y, z'
'-x, y+1/2, -z'
 
_cell_length_a                          8.1535(2)
_cell_length_b                          7.8737(2)
_cell_length_c                          16.9410(4)
_cell_angle_alpha                       90
_cell_angle_beta                        100.780(2)
_cell_angle_gamma                       90
_cell_volume                            1068.39(5)
_cell_formula_units_Z                   2
_cell_measurement_temperature           173(2)
_cell_measurement_reflns_used     4181
_cell_measurement_theta_min         2.45 
_cell_measurement_theta_max      25.99
 
#----------------------------------------------------------------------------#
#                   CRYSTAL INFORMATION                                      #
#----------------------------------------------------------------------------#

_exptl_crystal_description              plate
_exptl_crystal_colour                   colourless
_exptl_crystal_size_max                 0.2
_exptl_crystal_size_mid                 0.2
_exptl_crystal_size_min                 0.1
_exptl_crystal_density_diffrn           1.337
_exptl_crystal_density_method           'not measured'
_exptl_crystal_F_000                    452
_exptl_special_details
?
 
#----------------------------------------------------------------------------#
#                   ABSORPTION CORRECTION                                    #
#----------------------------------------------------------------------------#
 
_exptl_absorpt_coefficient_mu           0.263
_exptl_absorpt_correction_type          multi-scan
_exptl_absorpt_correction_T_min         0.949
_exptl_absorpt_correction_T_max         0.974
_exptl_absorpt_process_details
;
CrysAlis RED, Oxford Diffraction Ltd. Empirical absorption correction using
spherical harmonics, implemented in SCALE3 ABSPACK scaling algorithm.
;
 
#----------------------------------------------------------------------------#
#                   DATA COLLECTION                                          #
#----------------------------------------------------------------------------#
 
_diffrn_ambient_temperature             173(2)
_diffrn_radiation_wavelength            0.71073
_diffrn_radiation_type                  MoK\a
_diffrn_radiation_source          	'Enhance (Mo) X-ray Source'
_diffrn_radiation_monochromator         graphite
_diffrn_measurement_device_type   	'Xcalibur S Oxford Diffraction'
_diffrn_measurement_method        	Omega-scan
_diffrn_reflns_av_R_equivalents         0.0369
_diffrn_reflns_av_unetI/netI            0.021
_diffrn_reflns_number                   46918
_diffrn_reflns_limit_h_min              -10
_diffrn_reflns_limit_h_max              10
_diffrn_reflns_limit_k_min              -9
_diffrn_reflns_limit_k_max              9
_diffrn_reflns_limit_l_min              -20
_diffrn_reflns_limit_l_max              20
_diffrn_reflns_theta_min                2.45
_diffrn_reflns_theta_max                25.99
_diffrn_reflns_theta_full               25.99
_diffrn_measured_fraction_theta_full
                                        1
_diffrn_measured_fraction_theta_max
                                        1
_reflns_number_total                    4181
_reflns_number_gt                       3920
_reflns_threshold_expression            >2sigma(I)
 
#----------------------------------------------------------------------------#
#                   COMPUTER PROGRAMS USED                                   #
#----------------------------------------------------------------------------#
 
_computing_data_collection
;
CrysAlis CCD, Oxford Diffraction Ltd.,
Version 1.171.32.37 (release 24-10-2008 CrysAlis171 .NET)
(compiled Oct 24 2008,09:44:38)
;

_computing_cell_refinement
;
CrysAlis RED, Oxford Diffraction Ltd.,
Version 1.171.32.37 (release 24-10-2008 CrysAlis171 .NET)
(compiled Oct 24 2008,09:44:38)'
;

_computing_data_reduction
;
CrysAlis RED, Oxford Diffraction Ltd.,
Version 1.171.32.37 (release 24-10-2008 CrysAlis171 .NET)
(compiled Oct 24 2008,09:44:38)
;

_computing_structure_solution     'SHELXS-97 (Sheldrick, 2008)'
_computing_structure_refinement   'SHELXL-97 (Sheldrick, 2008)'
_computing_molecular_graphics    
;
Ortep-3 (Farrugia, 1997)
;
_computing_publication_material   'wingx (Farrugia, 1999)'
 
#----------------------------------------------------------------------------#
#                   STRUCTURE SOLUTION
#----------------------------------------------------------------------------#
 
_atom_sites_solution_primary            direct
_atom_sites_solution_secondary          difmap
_atom_sites_solution_hydrogens          geom
 
#----------------------------------------------------------------------------#
#                   REFINEMENT INFORMATION                                   #
#----------------------------------------------------------------------------#
 
_refine_special_details
;
 Refinement of F^2^ against ALL reflections.  The weighted R-factor wR and
 goodness of fit S are based on F^2^, conventional R-factors R are based
 on F, with F set to zero for negative F^2^. The threshold expression of
 F^2^ > 2sigma(F^2^) is used only for calculating R-factors(gt) etc. and is
 not relevant to the choice of reflections for refinement.  R-factors based
 on F^2^ are statistically about twice as large as those based on F, and R-
 factors based on ALL data will be even larger.
;
_refine_ls_structure_factor_coef        Fsqd
_refine_ls_matrix_type                  full
_refine_ls_weighting_scheme             calc
_refine_ls_weighting_details
         'calc w=1/[\s^2^(Fo^2^)+(0.0455P)^2^+0.0000P] where P=(Fo^2^+2Fc^2^)/3'
_refine_ls_hydrogen_treatment           mixed
_refine_ls_extinction_method            none
_refine_ls_number_reflns                4181
_refine_ls_number_parameters            270
_refine_ls_number_restraints            1
_refine_ls_R_factor_all                 0.0257
_refine_ls_R_factor_gt                  0.0237
_refine_ls_wR_factor_ref                0.0624
_refine_ls_wR_factor_gt                 0.062
_refine_ls_goodness_of_fit_ref          1
_refine_ls_restrained_S_all             1
_refine_ls_shift/su_max                 0
_refine_ls_shift/su_mean                0
_refine_ls_abs_structure_details
                                    'Flack H D (1983), Acta Cryst. A39, 876-881'
_refine_ls_abs_structure_Flack          0.01(4)
_refine_diff_density_max                0.207
_refine_diff_density_min                -0.228
_refine_diff_density_rms                0.034
 
#----------------------------------------------------------------------------#
#                   ATOMIC TYPES, COORDINATES AND THERMAL PARAMETERS         #
#----------------------------------------------------------------------------#
 
loop_
    _atom_type_symbol
    _atom_type_description
    _atom_type_scat_dispersion_real
    _atom_type_scat_dispersion_imag
    _atom_type_scat_source
C C 0.0033 0.0016 'International Tables Vol C Tables 4.2.6.8 and 6.1.1.4'
H H 0 0 'International Tables Vol C Tables 4.2.6.8 and 6.1.1.4'
N N 0.0061 0.0033 'International Tables Vol C Tables 4.2.6.8 and 6.1.1.4'
O O 0.0106 0.006 'International Tables Vol C Tables 4.2.6.8 and 6.1.1.4'
Si Si 0.0817 0.0704 'International Tables Vol C Tables 4.2.6.8 and 6.1.1.4'
Cl Cl 0.1484 0.1585 'International Tables Vol C Tables 4.2.6.8 and 6.1.1.4'
 
loop_
    _atom_site_label
    _atom_site_type_symbol
    _atom_site_fract_x
    _atom_site_fract_y
    _atom_site_fract_z
    _atom_site_U_iso_or_equiv
    _atom_site_adp_type
    _atom_site_occupancy
    _atom_site_symmetry_multiplicity
    _atom_site_calc_flag
    _atom_site_refinement_flags
    _atom_site_disorder_assembly
    _atom_site_disorder_group
H1N H 0.685(2) 0.609(3) 0.1130(11) 0.036(5) Uiso 1 1 d . . .
H2N H 0.583(2) 0.732(2) 0.0772(11) 0.025(5) Uiso 1 1 d . . .
C1 C 0.82151(18) 0.58855(19) 0.32712(9) 0.0208(3) Uani 1 1 d . . .
C2 C 0.9168(2) 0.4700(2) 0.29360(9) 0.0315(4) Uani 1 1 d . . .
H2 H 0.8815 0.4365 0.2392 0.038 Uiso 1 1 calc R . .
C3 C 1.0608(2) 0.4006(3) 0.33779(10) 0.0357(4) Uani 1 1 d . . .
H3 H 1.1235 0.3208 0.3136 0.043 Uiso 1 1 calc R . .
C4 C 1.1135(2) 0.4471(2) 0.41685(10) 0.0317(4) Uani 1 1 d . . .
H4 H 1.213 0.4 0.4472 0.038 Uiso 1 1 calc R . .
C5 C 1.0220(2) 0.5617(3) 0.45173(10) 0.0351(4) Uani 1 1 d . . .
H5 H 1.0577 0.5931 0.5064 0.042 Uiso 1 1 calc R . .
C6 C 0.8780(2) 0.6316(2) 0.40755(9) 0.0283(4) Uani 1 1 d . . .
H6 H 0.816 0.7107 0.4325 0.034 Uiso 1 1 calc R . .
C7 C 0.53523(19) 0.8318(2) 0.33596(9) 0.0240(3) Uani 1 1 d . . .
C8 C 0.6213(2) 0.9764(2) 0.36834(10) 0.0322(4) Uani 1 1 d . . .
H8 H 0.7262 1.002 0.3545 0.039 Uiso 1 1 calc R . .
C9 C 0.5585(3) 1.0834(3) 0.41981(11) 0.0439(5) Uani 1 1 d . . .
H9 H 0.6199 1.1806 0.4414 0.053 Uiso 1 1 calc R . .
C10 C 0.4053(3) 1.0478(3) 0.43977(12) 0.0518(6) Uani 1 1 d . . .
H10 H 0.3608 1.1209 0.4751 0.062 Uiso 1 1 calc R . .
C11 C 0.3179(3) 0.9074(3) 0.40874(14) 0.0552(6) Uani 1 1 d . . .
H11 H 0.213 0.8834 0.4229 0.066 Uiso 1 1 calc R . .
C12 C 0.3802(2) 0.8000(2) 0.35695(11) 0.0371(4) Uani 1 1 d . . .
H12 H 0.3171 0.7036 0.3354 0.045 Uiso 1 1 calc R . .
C13 C 0.47265(17) 0.51811(19) 0.22567(9) 0.0210(3) Uani 1 1 d . . .
C14 C 0.49292(19) 0.3466(2) 0.24798(10) 0.0268(4) Uani 1 1 d . . .
H14 H 0.5879 0.313 0.2863 0.032 Uiso 1 1 calc R . .
C15 C 0.3774(2) 0.2263(2) 0.21524(11) 0.0324(4) Uani 1 1 d . . .
H15 H 0.3931 0.1109 0.2313 0.039 Uiso 1 1 calc R . .
C16 C 0.23873(19) 0.2722(2) 0.15918(9) 0.0287(3) Uani 1 1 d . . .
H16 H 0.1594 0.1888 0.1367 0.034 Uiso 1 1 calc R . .
C17 C 0.21613(19) 0.4403(2) 0.13608(9) 0.0271(3) Uani 1 1 d . . .
H17 H 0.1212 0.4726 0.0975 0.033 Uiso 1 1 calc R . .
C18 C 0.33077(18) 0.5606(2) 0.16891(9) 0.0235(3) Uani 1 1 d . . .
H18 H 0.3133 0.6756 0.1527 0.028 Uiso 1 1 calc R . .
C19 C 0.67095(18) 0.82154(19) 0.18224(8) 0.0224(3) Uani 1 1 d . . .
H19 H 0.5817 0.9101 0.171 0.027 Uiso 1 1 calc R . .
C20 C 0.8407(2) 0.9138(2) 0.19703(10) 0.0301(4) Uani 1 1 d . . .
H20A H 0.8259 1.0364 0.1847 0.036 Uiso 1 1 calc R . .
H20B H 0.898 0.9006 0.2536 0.036 Uiso 1 1 calc R . .
C21 C 0.9399(2) 0.8290(2) 0.14041(12) 0.0366(4) Uani 1 1 d . . .
H21A H 1.025 0.9073 0.1264 0.044 Uiso 1 1 calc R . .
H21B H 0.9962 0.7251 0.1649 0.044 Uiso 1 1 calc R . .
C22 C 0.8115(2) 0.7864(2) 0.06803(10) 0.0314(4) Uani 1 1 d . . .
H22A H 0.8521 0.6974 0.0352 0.038 Uiso 1 1 calc R . .
H22B H 0.7789 0.888 0.0343 0.038 Uiso 1 1 calc R . .
Cl Cl 0.73780(4) 0.28732(4) 0.03143(2) 0.02501(10) Uani 1 1 d . . .
N N 0.66925(18) 0.7230(2) 0.10473(8) 0.0270(3) Uani 1 1 d . . .
O1 O 0.76815(17) 0.37628(17) 0.10687(7) 0.0437(3) Uani 1 1 d . . .
O2 O 0.60734(14) 0.16567(18) 0.03106(8) 0.0447(3) Uani 1 1 d . . .
O3 O 0.68629(19) 0.40556(17) -0.03260(8) 0.0492(4) Uani 1 1 d . . .
O4 O 0.88658(13) 0.20221(17) 0.02180(7) 0.0366(3) Uani 1 1 d . . .
Si Si 0.62563(5) 0.68424(5) 0.26869(2) 0.01902(10) Uani 1 1 d . . .
 
loop_
    _atom_site_aniso_label
    _atom_site_aniso_U_11
    _atom_site_aniso_U_22
    _atom_site_aniso_U_33
    _atom_site_aniso_U_23
    _atom_site_aniso_U_13
    _atom_site_aniso_U_12
C1 0.0205(7) 0.0228(8) 0.0192(7) 0.0036(6) 0.0035(5) 0.0013(6)
C2 0.0342(9) 0.0375(10) 0.0210(8) -0.0054(7) 0.0003(7) 0.0115(8)
C3 0.0341(9) 0.0422(10) 0.0302(9) -0.0004(8) 0.0051(7) 0.0157(8)
C4 0.0250(8) 0.0395(10) 0.0282(9) 0.0076(8) -0.0014(7) 0.0091(7)
C5 0.0327(9) 0.0514(11) 0.0182(8) 0.0022(8) -0.0033(7) 0.0065(8)
C6 0.0297(8) 0.0353(9) 0.0201(8) 0.0002(7) 0.0046(6) 0.0087(7)
C7 0.0281(8) 0.0264(9) 0.0174(7) 0.0043(6) 0.0036(6) 0.0101(6)
C8 0.0345(9) 0.0352(10) 0.0245(8) -0.0041(7) -0.0010(7) 0.0112(7)
C9 0.0644(13) 0.0378(11) 0.0252(9) -0.0038(8) -0.0022(8) 0.0208(10)
C10 0.0803(16) 0.0473(13) 0.0336(11) 0.0040(9) 0.0256(10) 0.0351(12)
C11 0.0640(14) 0.0524(13) 0.0624(14) 0.0160(12) 0.0458(12) 0.0218(12)
C12 0.0422(9) 0.0343(10) 0.0400(10) 0.0086(9) 0.0210(8) 0.0087(8)
C13 0.0194(7) 0.0258(8) 0.0182(7) 0.0021(6) 0.0043(6) 0.0020(6)
C14 0.0223(8) 0.0263(8) 0.0297(9) 0.0041(7) -0.0007(6) 0.0034(6)
C15 0.0337(9) 0.0224(8) 0.0408(10) 0.0027(7) 0.0060(7) 0.0013(7)
C16 0.0277(8) 0.0288(9) 0.0291(8) -0.0019(7) 0.0038(6) -0.0061(7)
C17 0.0211(7) 0.0369(10) 0.0221(8) 0.0024(7) 0.0007(6) 0.0024(7)
C18 0.0236(8) 0.0224(8) 0.0247(8) 0.0058(6) 0.0049(6) 0.0034(6)
C19 0.0238(7) 0.0243(8) 0.0187(7) 0.0013(6) 0.0031(6) 0.0047(6)
C20 0.0341(9) 0.0277(8) 0.0273(8) 0.0009(7) 0.0034(7) -0.0074(7)
C21 0.0268(8) 0.0316(10) 0.0545(11) -0.0029(8) 0.0153(8) -0.0093(7)
C22 0.0418(9) 0.0268(8) 0.0306(9) 0.0011(8) 0.0195(7) -0.0017(8)
Cl 0.02247(17) 0.02628(19) 0.02421(19) -0.00694(15) -0.00100(13) 0.00130(15)
N 0.0227(7) 0.0407(10) 0.0173(7) -0.0035(6) 0.0031(5) -0.0030(6)
O1 0.0530(8) 0.0484(8) 0.0269(7) -0.0170(6) 0.0001(6) 0.0008(7)
O2 0.0249(6) 0.0537(9) 0.0546(8) -0.0117(7) 0.0051(5) -0.0119(6)
O3 0.0688(9) 0.0344(7) 0.0354(7) -0.0001(6) -0.0135(7) 0.0123(7)
O4 0.0227(5) 0.0401(7) 0.0468(7) -0.0070(6) 0.0061(5) 0.0013(5)
Si 0.01846(19) 0.0214(2) 0.01667(19) 0.00094(17) 0.00186(14) 0.00333(16)
 
 
#----------------------------------------------------------------------------#
#                   MOLECULAR GEOMETRY                                       #
#----------------------------------------------------------------------------#
 
_geom_special_details
;
 All esds (except the esd in the dihedral angle between two l.s. planes)
 are estimated using the full covariance matrix.  The cell esds are taken
 into account individually in the estimation of esds in distances, angles
 and torsion angles; correlations between esds in cell parameters are only
 used when they are defined by crystal symmetry.  An approximate (isotropic)
 treatment of cell esds is used for estimating esds involving l.s. planes.
;
loop_
    _geom_bond_atom_site_label_1
    _geom_bond_atom_site_label_2
    _geom_bond_distance
    _geom_bond_site_symmetry_2
    _geom_bond_publ_flag
C1 C6 1.396(2) . ?
C1 C2 1.401(2) . ?
C1 Si 1.8727(15) . ?
C2 C3 1.382(2) . ?
C3 C4 1.377(2) . ?
C4 C5 1.373(2) . ?
C5 C6 1.384(2) . ?
C7 C8 1.395(2) . ?
C7 C12 1.398(2) . ?
C7 Si 1.8724(15) . ?
C8 C9 1.378(2) . ?
C9 C10 1.383(3) . ?
C10 C11 1.365(3) . ?
C11 C12 1.382(3) . ?
C13 C18 1.399(2) . ?
C13 C14 1.404(2) . ?
C13 Si 1.8595(15) . ?
C14 C15 1.378(2) . ?
C15 C16 1.381(2) . ?
C16 C17 1.383(2) . ?
C17 C18 1.373(2) . ?
C19 N 1.5229(19) . ?
C19 C20 1.542(2) . ?
C19 Si 1.9111(15) . ?
C20 C21 1.520(2) . ?
C21 C22 1.494(3) . ?
C22 N 1.4999(19) . ?
Cl O4 1.4217(12) . ?
Cl O2 1.4305(13) . ?
Cl O3 1.4316(13) . ?
Cl O1 1.4376(12) . ?
 
loop_
    _geom_angle_atom_site_label_1
    _geom_angle_atom_site_label_2
    _geom_angle_atom_site_label_3
    _geom_angle
    _geom_angle_site_symmetry_1
    _geom_angle_site_symmetry_3
    _geom_angle_publ_flag
C6 C1 C2 116.81(14) . . ?
C6 C1 Si 120.75(11) . . ?
C2 C1 Si 122.44(11) . . ?
C3 C2 C1 121.55(15) . . ?
C4 C3 C2 120.08(16) . . ?
C5 C4 C3 119.80(15) . . ?
C4 C5 C6 120.23(15) . . ?
C5 C6 C1 121.54(15) . . ?
C8 C7 C12 117.28(15) . . ?
C8 C7 Si 121.30(12) . . ?
C12 C7 Si 121.41(13) . . ?
C9 C8 C7 121.92(17) . . ?
C8 C9 C10 119.38(19) . . ?
C11 C10 C9 120.00(18) . . ?
C10 C11 C12 120.84(19) . . ?
C11 C12 C7 120.58(19) . . ?
C18 C13 C14 117.08(14) . . ?
C18 C13 Si 120.60(12) . . ?
C14 C13 Si 122.32(11) . . ?
C15 C14 C13 121.07(14) . . ?
C14 C15 C16 120.45(15) . . ?
C15 C16 C17 119.58(15) . . ?
C18 C17 C16 120.07(14) . . ?
C17 C18 C13 121.74(15) . . ?
N C19 C20 104.08(12) . . ?
N C19 Si 113.62(10) . . ?
C20 C19 Si 116.00(10) . . ?
C21 C20 C19 104.93(13) . . ?
C22 C21 C20 104.03(13) . . ?
C21 C22 N 102.24(12) . . ?
O4 Cl O2 109.48(8) . . ?
O4 Cl O3 110.81(9) . . ?
O2 Cl O3 108.64(9) . . ?
O4 Cl O1 108.84(8) . . ?
O2 Cl O1 109.54(8) . . ?
O3 Cl O1 109.52(8) . . ?
C22 N C19 107.75(12) . . ?
C13 Si C7 111.31(7) . . ?
C13 Si C1 111.55(7) . . ?
C7 Si C1 108.77(7) . . ?
C13 Si C19 108.01(6) . . ?
C7 Si C19 105.67(7) . . ?
C1 Si C19 111.39(6) . . ?
 
# The following lines are used to test the character set of files sent by
# network email or other means. They are not part of the CIF data set
# abcdefghijklmnopqrstuvwxyzABCDEFGHIJKLMNOPQRSTUVWXYZ0123456789
# !@#$%^&*()_+{}:"~<>?|\-=[];'`,./
 
# END of CIF
