# Supplementary material
Source: MDPI journal article supplement (https://www.mdpi.com/2304-6740/5/4/88)
Supplement: s1 [file s1 › ccdc_1582446.cif]

#\#CIF_1.1
 
#  CIF produced by WinGX routine CIF_UPDATE
#  Created on 2017-10-26 at 13:47:39
#  Using CIFtbx version 2.6.2 16 Jun 1998
 
#  Dictionary name : cif_core.dic
#  Dictionary vers : 2.4
#  Request file    : c:\program files\wingx\wingx\files\archive.reqdat
#  CIF files read  : 1530
 
#------------------ SECTION 1. GLOBAL INFORMATION ---------------------------#
 
data_global
 
#------------------ AUDIT DETAILS -------------------------------------------#
 
_audit_creation_date            2017-10-26
_audit_creation_method          'WinGX routine CIF_UPDATE'
_audit_conform_dict_name        cif_core.dic
_audit_conform_dict_version     2.4
_audit_conform_dict_location    ftp://ftp.iucr.org/pub/cif_core.dic
_audit_update_record            
;
?

2017-10-26 # Formatted by publCIF
;

 
#==============================================================================
#
# SUBMISSION DETAILS
 
_publ_contact_author_name            
'Prof. Dr. Carsten Strohmann'
 
_publ_contact_author_address
;
Anorganische Chemie,
Fakult\"at f\"ur Chemie und Chemische Biologie,
Technische Universit\"at Dortmund,
Otto-Hahn-Strasse 6,
D-44227 Dortmund,
Germany
;
# Address of author for correspondence
 
_publ_contact_author_email           mail@carsten-strohmann.de
_publ_contact_author_fax             '0049 231 755 3797'
_publ_contact_author_phone           '0049 231 755 3807'
 
_publ_contact_letter
;
 
Please consider this CIF for submission to the Cambridge Crystallographic
Data Centre. I certify that all authors have seen and approved of this
submission, that all have made significant scientific contributions to the
work reported, and that all share responsibility and accountability for
the results.
 
This CIF is submitted as part of a journal submission
<Inorganics>
;
 
 
#==============================================================================
#
# TITLE AND AUTHOR LIST
 
_publ_section_title
;
Molecular Structures of Enantiomerically Pure (S)-2-(Triphenylsilyl)- and
 (S)-2-(Methyldiphenylsilyl)pyrrolidinium Salts
;

_publ_section_title_footnote
.
 
# The loop structure below should contain the names and addresses of all
# authors, in the required order of publication. Repeat as necessary.
 
loop_
 _publ_author_name
 _publ_author_footnote
'Bauer, Jonathan O.'                  
;Institut f\"ur Anorganische Chemie,
Fakult\"at f\"ur Chemie und Pharmazie, 
Universit\"at Regensburg,
Universit\"atsstrasse 31, 
D-93053 Regensburg, 
Germany
;
'Strohmann, Carsten'                  
;Anorganische Chemie,
Fakult\"at f\"ur Chemie und Chemische Biologie,
Technische Universit\"at Dortmund,
Otto-Hahn-Strasse 6,
D-44227 Dortmund,
Germany
;
 
#------------------  SECTION 2. COMPOUND(S) DETAILS -------------------------#
 
data_1530
 
_audit_creation_date                    2017-10-26T13:47:39-00:00
_audit_creation_method                  'WinGX routine CIF_UPDATE'
 
#----------------------------------------------------------------------------#
#                   CHEMICAL INFORMATION                                     #
#----------------------------------------------------------------------------#
 
_chemical_name_systematic
?
_symmetry_cell_setting             monoclinic
_symmetry_space_group_name_H-M     'P 21'
_symmetry_space_group_name_hall      'P 2yb'
_chemical_formula_moiety                'C17 H22 N Si, Cl O4'
_chemical_formula_sum                   'C17 H22 Cl N O4 Si'
_chemical_formula_weight                367.9
_chemical_absolute_configuration        ad
 
#----------------------------------------------------------------------------#
#                   UNIT CELL INFORMATION                                    #
#----------------------------------------------------------------------------#
 
loop_
    _symmetry_equiv_pos_as_xyz
'x, y, z'
'-x, y+1/2, -z'
 
_cell_length_a                          9.6006(6)
_cell_length_b                          14.2054(8)
_cell_length_c                          13.3890(8)
_cell_angle_alpha                       90
_cell_angle_beta                        91.537(6)
_cell_angle_gamma                       90
_cell_volume                            1825.34(19)
_cell_formula_units_Z                   4
_cell_measurement_temperature           173(2)
_cell_measurement_reflns_used     7177
_cell_measurement_theta_min         2.56 
_cell_measurement_theta_max      26.00
 
#----------------------------------------------------------------------------#
#                   CRYSTAL INFORMATION                                      #
#----------------------------------------------------------------------------#

_exptl_crystal_description              plate
_exptl_crystal_colour                   colourless
_exptl_crystal_size_max                 0.2
_exptl_crystal_size_mid                 0.2
_exptl_crystal_size_min                 0.1
_exptl_crystal_density_diffrn           1.339
_exptl_crystal_density_method           'not measured'
_exptl_crystal_F_000                    776
_exptl_special_details
?
 
#----------------------------------------------------------------------------#
#                   ABSORPTION CORRECTION                                    #
#----------------------------------------------------------------------------#
 
_exptl_absorpt_coefficient_mu           0.295
_exptl_absorpt_correction_type          multi-scan
_exptl_absorpt_correction_T_min         0.943
_exptl_absorpt_correction_T_max         0.971
_exptl_absorpt_process_details
;
CrysAlis RED, Oxford Diffraction Ltd. Empirical absorption correction using
spherical harmonics, implemented in SCALE3 ABSPACK scaling algorithm.
;
 
#----------------------------------------------------------------------------#
#                   DATA COLLECTION                                          #
#----------------------------------------------------------------------------#
 
_diffrn_ambient_temperature             173(2)
_diffrn_radiation_wavelength            0.71073
_diffrn_radiation_type                  MoK\a
_diffrn_radiation_source          	'Enhance (Mo) X-ray Source'
_diffrn_radiation_monochromator         graphite
_diffrn_measurement_device_type   	'Xcalibur S Oxford Diffraction'
_diffrn_measurement_method        	Omega-scan
_diffrn_reflns_av_R_equivalents         0.054
_diffrn_reflns_av_unetI/netI            0.078
_diffrn_reflns_number                   28993
_diffrn_reflns_limit_h_min              -11
_diffrn_reflns_limit_h_max              11
_diffrn_reflns_limit_k_min              -17
_diffrn_reflns_limit_k_max              17
_diffrn_reflns_limit_l_min              -16
_diffrn_reflns_limit_l_max              16
_diffrn_reflns_theta_min                2.56
_diffrn_reflns_theta_max                26
_diffrn_reflns_theta_full               26
_diffrn_measured_fraction_theta_full
                                        0.999
_diffrn_measured_fraction_theta_max
                                        0.999
_reflns_number_total                    7177
_reflns_number_gt                       5069
_reflns_threshold_expression            >2sigma(I)
 
#----------------------------------------------------------------------------#
#                   COMPUTER PROGRAMS USED                                   #
#----------------------------------------------------------------------------#
 
_computing_data_collection
;
CrysAlis CCD, Oxford Diffraction Ltd.,
Version 1.171.32.37 (release 24-10-2008 CrysAlis171 .NET)
(compiled Oct 24 2008,09:44:38)
;

_computing_cell_refinement
;
CrysAlis RED, Oxford Diffraction Ltd.,
Version 1.171.32.37 (release 24-10-2008 CrysAlis171 .NET)
(compiled Oct 24 2008,09:44:38)'
;

_computing_data_reduction
;
CrysAlis RED, Oxford Diffraction Ltd.,
Version 1.171.32.37 (release 24-10-2008 CrysAlis171 .NET)
(compiled Oct 24 2008,09:44:38)
;

_computing_structure_solution     'SHELXS-97 (Sheldrick, 2008)'
_computing_structure_refinement   'SHELXL-97 (Sheldrick, 2008)'
_computing_molecular_graphics    
;
Ortep-3 (Farrugia, 1997)
;
_computing_publication_material   'wingx (Farrugia, 1999)'
 
#----------------------------------------------------------------------------#
#                   STRUCTURE SOLUTION
#----------------------------------------------------------------------------#
 
_atom_sites_solution_primary            direct
_atom_sites_solution_secondary          difmap
_atom_sites_solution_hydrogens          geom
 
#----------------------------------------------------------------------------#
#                   REFINEMENT INFORMATION                                   #
#----------------------------------------------------------------------------#
 
_refine_special_details
;
 Refinement of F^2^ against ALL reflections.  The weighted R-factor wR and
 goodness of fit S are based on F^2^, conventional R-factors R are based
 on F, with F set to zero for negative F^2^. The threshold expression of
 F^2^ > 2sigma(F^2^) is used only for calculating R-factors(gt) etc. and is
 not relevant to the choice of reflections for refinement.  R-factors based
 on F^2^ are statistically about twice as large as those based on F, and R-
 factors based on ALL data will be even larger.
;
_refine_ls_structure_factor_coef        Fsqd
_refine_ls_matrix_type                  full
_refine_ls_weighting_scheme             calc
_refine_ls_weighting_details
         'calc w=1/[\s^2^(Fo^2^)+(0.1069P)^2^+0.0000P] where P=(Fo^2^+2Fc^2^)/3'
_refine_ls_hydrogen_treatment           constr
_refine_ls_extinction_method            none
_refine_ls_number_reflns                7177
_refine_ls_number_parameters            435
_refine_ls_number_restraints            1
_refine_ls_R_factor_all                 0.0809
_refine_ls_R_factor_gt                  0.0596
_refine_ls_wR_factor_ref                0.1745
_refine_ls_wR_factor_gt                 0.1683
_refine_ls_goodness_of_fit_ref          1
_refine_ls_restrained_S_all             1
_refine_ls_shift/su_max                 0
_refine_ls_shift/su_mean                0
_refine_ls_abs_structure_details
                                    'Flack H D (1983), Acta Cryst. A39, 876-881'
_refine_ls_abs_structure_Flack          0.08(9)
_refine_diff_density_max                0.447
_refine_diff_density_min                -0.309
_refine_diff_density_rms                0.073
 
#----------------------------------------------------------------------------#
#                   ATOMIC TYPES, COORDINATES AND THERMAL PARAMETERS         #
#----------------------------------------------------------------------------#
 
loop_
    _atom_type_symbol
    _atom_type_description
    _atom_type_scat_dispersion_real
    _atom_type_scat_dispersion_imag
    _atom_type_scat_source
C C 0.0033 0.0016 'International Tables Vol C Tables 4.2.6.8 and 6.1.1.4'
H H 0 0 'International Tables Vol C Tables 4.2.6.8 and 6.1.1.4'
N N 0.0061 0.0033 'International Tables Vol C Tables 4.2.6.8 and 6.1.1.4'
O O 0.0106 0.006 'International Tables Vol C Tables 4.2.6.8 and 6.1.1.4'
Si Si 0.0817 0.0704 'International Tables Vol C Tables 4.2.6.8 and 6.1.1.4'
Cl Cl 0.1484 0.1585 'International Tables Vol C Tables 4.2.6.8 and 6.1.1.4'
 
loop_
    _atom_site_label
    _atom_site_type_symbol
    _atom_site_fract_x
    _atom_site_fract_y
    _atom_site_fract_z
    _atom_site_U_iso_or_equiv
    _atom_site_adp_type
    _atom_site_occupancy
    _atom_site_symmetry_multiplicity
    _atom_site_calc_flag
    _atom_site_refinement_flags
    _atom_site_disorder_assembly
    _atom_site_disorder_group
C1 C -0.1863(7) 0.8419(4) 0.4766(5) 0.0503(16) Uani 1 1 d . . .
H1A H -0.2757 0.8185 0.5003 0.075 Uiso 1 1 calc R . .
H1B H -0.189 0.8439 0.4034 0.075 Uiso 1 1 calc R . .
H1C H -0.1692 0.9053 0.503 0.075 Uiso 1 1 calc R . .
C2 C -0.0558(5) 0.7329(4) 0.6548(4) 0.0360(12) Uani 1 1 d . . .
C3 C -0.1183(6) 0.7961(4) 0.7208(4) 0.0396(13) Uani 1 1 d . . .
H3 H -0.1571 0.8529 0.695 0.047 Uiso 1 1 calc R . .
C4 C -0.1251(6) 0.7785(5) 0.8207(4) 0.0503(16) Uani 1 1 d . . .
H4 H -0.1645 0.8236 0.8641 0.06 Uiso 1 1 calc R . .
C5 C -0.0723(7) 0.6918(5) 0.8591(5) 0.0568(17) Uani 1 1 d . . .
H5 H -0.0789 0.6777 0.9281 0.068 Uiso 1 1 calc R . .
C6 C -0.0126(7) 0.6295(5) 0.7969(5) 0.0562(17) Uani 1 1 d . . .
H6 H 0.0259 0.5728 0.823 0.067 Uiso 1 1 calc R . .
C7 C -0.0074(7) 0.6476(4) 0.6968(5) 0.0537(17) Uani 1 1 d . . .
H7 H 0.0301 0.6011 0.6541 0.064 Uiso 1 1 calc R . .
C8 C 0.1282(6) 0.8161(3) 0.4936(4) 0.0332(12) Uani 1 1 d . . .
C9 C 0.2486(6) 0.7920(4) 0.5501(4) 0.0428(14) Uani 1 1 d . . .
H9 H 0.241 0.7472 0.6023 0.051 Uiso 1 1 calc R . .
C10 C 0.3753(6) 0.8305(4) 0.5326(5) 0.0461(14) Uani 1 1 d . . .
H10 H 0.4555 0.8111 0.5703 0.055 Uiso 1 1 calc R . .
C11 C 0.3856(7) 0.8993(4) 0.4579(5) 0.0548(18) Uani 1 1 d . . .
H11 H 0.4719 0.9301 0.4479 0.066 Uiso 1 1 calc R . .
C12 C 0.2699(7) 0.9222(4) 0.3989(5) 0.0503(16) Uani 1 1 d . . .
H12 H 0.2782 0.9648 0.3447 0.06 Uiso 1 1 calc R . .
C13 C 0.1444(7) 0.8833(4) 0.4190(4) 0.0456(15) Uani 1 1 d . . .
H13 H 0.0647 0.9025 0.3806 0.055 Uiso 1 1 calc R . .
C14 C -0.0584(5) 0.6477(4) 0.4508(4) 0.0329(12) Uani 1 1 d . . .
H14 H -0.0071 0.5991 0.4914 0.04 Uiso 1 1 calc R . .
C15 C -0.2068(6) 0.6089(4) 0.4275(5) 0.0462(14) Uani 1 1 d . . .
H15A H -0.246 0.5796 0.4876 0.055 Uiso 1 1 calc R . .
H15B H -0.2698 0.6601 0.4042 0.055 Uiso 1 1 calc R . .
C16 C -0.1892(6) 0.5385(4) 0.3484(5) 0.0492(16) Uani 1 1 d . . .
H16A H -0.2678 0.5425 0.2991 0.059 Uiso 1 1 calc R . .
H16B H -0.1882 0.4745 0.3775 0.059 Uiso 1 1 calc R . .
C17 C -0.0515(6) 0.5578(4) 0.2970(4) 0.0435(14) Uani 1 1 d . . .
H17A H 0.0149 0.5052 0.3077 0.052 Uiso 1 1 calc R . .
H17B H -0.0668 0.5676 0.2243 0.052 Uiso 1 1 calc R . .
C18 C 0.7484(6) 0.0317(4) 0.9535(5) 0.0461(14) Uani 1 1 d . . .
H18A H 0.8193 0.0729 0.9844 0.069 Uiso 1 1 calc R . .
H18B H 0.7601 0.0304 0.881 0.069 Uiso 1 1 calc R . .
H18C H 0.7588 -0.0321 0.9805 0.069 Uiso 1 1 calc R . .
C19 C 0.5538(5) 0.0890(3) 1.1196(4) 0.0341(12) Uani 1 1 d . . .
C20 C 0.6476(6) 0.0440(4) 1.1867(4) 0.0418(14) Uani 1 1 d . . .
H20 H 0.7211 0.007 1.1613 0.05 Uiso 1 1 calc R . .
C21 C 0.6346(6) 0.0527(4) 1.2882(5) 0.0470(15) Uani 1 1 d . . .
H21 H 0.7016 0.0239 1.3317 0.056 Uiso 1 1 calc R . .
C22 C 0.5268(6) 0.1022(4) 1.3276(4) 0.0460(15) Uani 1 1 d . . .
H22 H 0.515 0.1042 1.3978 0.055 Uiso 1 1 calc R . .
C23 C 0.4355(7) 0.1492(5) 1.2635(5) 0.0504(15) Uani 1 1 d . . .
H23 H 0.3642 0.1879 1.2893 0.06 Uiso 1 1 calc R . .
C24 C 0.4489(6) 0.1395(4) 1.1626(4) 0.0409(13) Uani 1 1 d . . .
H24 H 0.3819 0.1694 1.1198 0.049 Uiso 1 1 calc R . .
C25 C 0.4315(6) -0.0014(3) 0.9273(4) 0.0321(12) Uani 1 1 d . . .
C26 C 0.2932(6) 0.0092(4) 0.9516(4) 0.0440(14) Uani 1 1 d . . .
H26 H 0.2674 0.0588 0.995 0.053 Uiso 1 1 calc R . .
C27 C 0.1909(7) -0.0517(5) 0.9134(5) 0.0519(16) Uani 1 1 d . . .
H27 H 0.0966 -0.0441 0.9315 0.062 Uiso 1 1 calc R . .
C28 C 0.2274(7) -0.1229(4) 0.8491(5) 0.0520(16) Uani 1 1 d . . .
H28 H 0.1581 -0.1644 0.8227 0.062 Uiso 1 1 calc R . .
C29 C 0.3604(8) -0.1335(4) 0.8240(5) 0.0590(19) Uani 1 1 d . . .
H29 H 0.3842 -0.1833 0.7802 0.071 Uiso 1 1 calc R . .
C30 C 0.4648(7) -0.0736(4) 0.8603(4) 0.0439(14) Uani 1 1 d . . .
H30 H 0.5581 -0.0815 0.8398 0.053 Uiso 1 1 calc R . .
C31 C 0.5483(6) 0.1996(4) 0.9280(4) 0.0406(14) Uani 1 1 d . . .
H31 H 0.4861 0.2352 0.9734 0.049 Uiso 1 1 calc R . .
C32 C 0.6783(7) 0.2564(5) 0.9162(5) 0.0556(17) Uani 1 1 d . . .
H32A H 0.7518 0.2182 0.8852 0.067 Uiso 1 1 calc R . .
H32B H 0.7138 0.2797 0.9818 0.067 Uiso 1 1 calc R . .
C33 C 0.6345(9) 0.3388(5) 0.8479(5) 0.066(2) Uani 1 1 d . . .
H33A H 0.5927 0.3904 0.8867 0.079 Uiso 1 1 calc R . .
H33B H 0.715 0.3637 0.8115 0.079 Uiso 1 1 calc R . .
C34 C 0.5283(7) 0.2949(4) 0.7769(5) 0.0480(14) Uani 1 1 d . . .
H34A H 0.4472 0.3372 0.767 0.058 Uiso 1 1 calc R . .
H34B H 0.5699 0.283 0.7112 0.058 Uiso 1 1 calc R . .
Cl1 Cl 0.35054(13) 0.56065(9) 0.36867(10) 0.0378(3) Uani 1 1 d . . .
Cl2 Cl 0.12270(15) 0.29246(10) 0.86092(10) 0.0448(4) Uani 1 1 d . . .
N1 N 0.0003(5) 0.6465(3) 0.3474(3) 0.0373(11) Uani 1 1 d . . .
H1D H -0.0293 0.6986 0.3119 0.045 Uiso 1 1 calc R . .
H1E H 0.0961 0.6469 0.3512 0.045 Uiso 1 1 calc R . .
N2 N 0.4840(5) 0.2035(3) 0.8240(4) 0.0414(11) Uani 1 1 d . . .
H2A H 0.3885 0.2008 0.8268 0.05 Uiso 1 1 calc R . .
H2B H 0.514 0.1533 0.7869 0.05 Uiso 1 1 calc R . .
O1 O 0.2685(5) 0.5713(3) 0.4543(3) 0.0572(11) Uani 1 1 d . . .
O2 O 0.4837(5) 0.6012(4) 0.3840(5) 0.094(2) Uani 1 1 d . . .
O3 O 0.3585(7) 0.4626(4) 0.3468(5) 0.101(2) Uani 1 1 d . . .
O4 O 0.2851(5) 0.6105(4) 0.2890(4) 0.0741(16) Uani 1 1 d . . .
O5 O 0.2311(5) 0.2848(4) 0.9325(3) 0.0689(13) Uani 1 1 d . . .
O6 O 0.0186(5) 0.2257(4) 0.8794(4) 0.0731(15) Uani 1 1 d . . .
O7 O 0.0675(7) 0.3810(4) 0.8601(7) 0.132(3) Uani 1 1 d . . .
O8 O 0.1844(6) 0.2672(5) 0.7685(4) 0.100(2) Uani 1 1 d . . .
Si1 Si -0.04467(15) 0.76223(9) 0.52028(11) 0.0329(3) Uani 1 1 d . . .
Si2 Si 0.57247(14) 0.07727(10) 0.98109(11) 0.0333(3) Uani 1 1 d . . .
 
loop_
    _atom_site_aniso_label
    _atom_site_aniso_U_11
    _atom_site_aniso_U_22
    _atom_site_aniso_U_33
    _atom_site_aniso_U_23
    _atom_site_aniso_U_13
    _atom_site_aniso_U_12
C1 0.053(4) 0.046(4) 0.052(4) -0.005(3) -0.006(3) 0.013(3)
C2 0.030(3) 0.043(3) 0.035(3) -0.004(2) -0.001(2) 0.004(2)
C3 0.048(3) 0.027(3) 0.044(3) -0.006(2) 0.008(3) -0.010(3)
C4 0.037(3) 0.081(5) 0.033(3) -0.008(3) 0.005(3) -0.012(3)
C5 0.052(4) 0.085(5) 0.033(3) 0.005(3) 0.001(3) -0.004(4)
C6 0.062(4) 0.069(4) 0.038(3) 0.011(3) 0.002(3) 0.018(3)
C7 0.068(4) 0.047(4) 0.047(4) 0.010(3) 0.016(3) 0.021(3)
C8 0.037(3) 0.032(3) 0.030(3) -0.007(2) 0.001(2) -0.003(2)
C9 0.052(4) 0.030(3) 0.046(3) 0.006(3) 0.012(3) 0.009(3)
C10 0.038(3) 0.046(3) 0.054(4) -0.007(3) 0.003(3) -0.002(3)
C11 0.062(4) 0.045(4) 0.058(4) -0.016(3) 0.028(4) -0.020(3)
C12 0.070(4) 0.046(4) 0.035(3) -0.003(3) 0.010(3) -0.014(3)
C13 0.068(4) 0.038(3) 0.032(3) -0.003(2) 0.006(3) 0.001(3)
C14 0.035(3) 0.034(3) 0.029(3) 0.005(2) 0.000(2) 0.004(2)
C15 0.041(3) 0.045(3) 0.052(4) -0.003(3) 0.006(3) -0.011(3)
C16 0.049(4) 0.040(4) 0.058(4) 0.007(3) -0.012(3) -0.018(3)
C17 0.052(3) 0.026(3) 0.052(3) -0.016(3) -0.007(3) -0.002(3)
C18 0.042(3) 0.047(3) 0.050(3) -0.003(3) 0.004(3) 0.009(3)
C19 0.037(3) 0.024(3) 0.041(3) 0.004(2) -0.002(2) -0.002(2)
C20 0.043(3) 0.038(3) 0.043(3) 0.003(2) -0.006(3) -0.008(2)
C21 0.045(3) 0.046(4) 0.050(4) 0.017(3) -0.012(3) -0.009(3)
C22 0.057(4) 0.051(4) 0.030(3) 0.006(3) 0.005(3) -0.018(3)
C23 0.048(4) 0.058(4) 0.045(4) 0.006(3) 0.010(3) 0.006(3)
C24 0.043(3) 0.046(3) 0.033(3) 0.005(2) 0.006(3) 0.004(3)
C25 0.042(3) 0.028(3) 0.026(3) 0.008(2) -0.003(2) 0.002(2)
C26 0.049(4) 0.039(3) 0.043(3) 0.011(3) -0.007(3) 0.005(3)
C27 0.045(4) 0.065(4) 0.045(4) 0.015(3) -0.010(3) -0.012(3)
C28 0.051(4) 0.047(4) 0.058(4) 0.005(3) -0.017(3) -0.004(3)
C29 0.093(6) 0.034(3) 0.048(4) 0.001(3) -0.013(4) -0.002(4)
C30 0.051(4) 0.044(3) 0.037(3) 0.000(3) -0.002(3) 0.000(3)
C31 0.058(4) 0.029(3) 0.036(3) -0.001(2) 0.020(3) 0.005(3)
C32 0.068(4) 0.056(4) 0.041(3) 0.004(3) -0.012(3) -0.027(3)
C33 0.098(6) 0.037(4) 0.063(4) 0.009(3) 0.003(4) -0.013(4)
C34 0.067(4) 0.030(3) 0.047(3) 0.010(3) 0.005(3) -0.001(3)
Cl1 0.0329(6) 0.0352(7) 0.0454(7) 0.0026(6) 0.0030(6) -0.0040(6)
Cl2 0.0467(8) 0.0441(8) 0.0433(8) -0.0060(6) -0.0018(7) -0.0051(7)
N1 0.039(3) 0.026(2) 0.048(3) -0.0030(19) 0.008(2) -0.0070(19)
N2 0.050(3) 0.031(2) 0.044(3) 0.006(2) 0.003(2) 0.002(2)
O1 0.080(3) 0.049(2) 0.042(2) 0.006(2) 0.006(2) -0.005(2)
O2 0.036(2) 0.112(5) 0.135(5) 0.039(4) -0.009(3) -0.021(3)
O3 0.144(6) 0.046(3) 0.118(5) -0.011(3) 0.069(4) -0.018(3)
O4 0.049(3) 0.112(4) 0.061(3) 0.039(3) -0.001(2) -0.015(3)
O5 0.058(3) 0.097(4) 0.052(3) 0.003(3) -0.001(2) 0.001(3)
O6 0.064(3) 0.076(3) 0.080(4) -0.013(3) 0.021(3) -0.029(3)
O7 0.101(5) 0.045(3) 0.247(9) 0.000(4) -0.044(5) 0.021(3)
O8 0.103(4) 0.144(6) 0.054(3) -0.038(3) 0.021(3) -0.075(4)
Si1 0.0362(8) 0.0294(7) 0.0331(8) -0.0020(6) 0.0005(6) 0.0019(6)
Si2 0.0323(7) 0.0316(8) 0.0360(8) 0.0024(6) -0.0002(6) 0.0041(6)
 
 
#----------------------------------------------------------------------------#
#                   MOLECULAR GEOMETRY                                       #
#----------------------------------------------------------------------------#
 
_geom_special_details
;
 All esds (except the esd in the dihedral angle between two l.s. planes)
 are estimated using the full covariance matrix.  The cell esds are taken
 into account individually in the estimation of esds in distances, angles
 and torsion angles; correlations between esds in cell parameters are only
 used when they are defined by crystal symmetry.  An approximate (isotropic)
 treatment of cell esds is used for estimating esds involving l.s. planes.
;
loop_
    _geom_bond_atom_site_label_1
    _geom_bond_atom_site_label_2
    _geom_bond_distance
    _geom_bond_site_symmetry_2
    _geom_bond_publ_flag
C1 Si1 1.852(6) . ?
C2 C3 1.405(7) . ?
C2 C7 1.410(8) . ?
C2 Si1 1.855(6) . ?
C3 C4 1.364(8) . ?
C4 C5 1.422(10) . ?
C5 C6 1.353(9) . ?
C6 C7 1.367(8) . ?
C8 C13 1.393(8) . ?
C8 C9 1.405(8) . ?
C8 Si1 1.871(5) . ?
C9 C10 1.360(8) . ?
C10 C11 1.404(9) . ?
C11 C12 1.384(10) . ?
C12 C13 1.359(9) . ?
C14 N1 1.508(7) . ?
C14 C15 1.551(8) . ?
C14 Si1 1.878(5) . ?
C15 C16 1.470(8) . ?
C16 C17 1.531(8) . ?
C17 N1 1.508(6) . ?
C18 Si2 1.856(6) . ?
C19 C24 1.376(7) . ?
C19 C20 1.408(8) . ?
C19 Si2 1.875(6) . ?
C20 C21 1.373(8) . ?
C21 C22 1.368(9) . ?
C22 C23 1.382(8) . ?
C23 C24 1.368(8) . ?
C25 C26 1.384(8) . ?
C25 C30 1.405(8) . ?
C25 Si2 1.884(5) . ?
C26 C27 1.396(9) . ?
C27 C28 1.379(9) . ?
C28 C29 1.337(10) . ?
C29 C30 1.393(9) . ?
C31 C32 1.498(8) . ?
C31 N2 1.509(7) . ?
C31 Si2 1.889(5) . ?
C32 C33 1.538(9) . ?
C33 C34 1.510(9) . ?
C34 N2 1.510(7) . ?
Cl1 O2 1.413(5) . ?
Cl1 O4 1.413(5) . ?
Cl1 O1 1.416(4) . ?
Cl1 O3 1.426(5) . ?
Cl2 O7 1.365(6) . ?
Cl2 O5 1.400(5) . ?
Cl2 O6 1.405(5) . ?
Cl2 O8 1.431(5) . ?
 
loop_
    _geom_angle_atom_site_label_1
    _geom_angle_atom_site_label_2
    _geom_angle_atom_site_label_3
    _geom_angle
    _geom_angle_site_symmetry_1
    _geom_angle_site_symmetry_3
    _geom_angle_publ_flag
C3 C2 C7 116.1(5) . . ?
C3 C2 Si1 120.3(4) . . ?
C7 C2 Si1 123.6(4) . . ?
C4 C3 C2 122.2(6) . . ?
C3 C4 C5 119.1(6) . . ?
C6 C5 C4 119.8(6) . . ?
C5 C6 C7 120.5(6) . . ?
C6 C7 C2 122.1(6) . . ?
C13 C8 C9 116.6(5) . . ?
C13 C8 Si1 122.2(5) . . ?
C9 C8 Si1 121.2(4) . . ?
C10 C9 C8 122.4(6) . . ?
C9 C10 C11 118.9(6) . . ?
C12 C11 C10 119.9(6) . . ?
C13 C12 C11 119.6(6) . . ?
C12 C13 C8 122.4(6) . . ?
N1 C14 C15 100.1(4) . . ?
N1 C14 Si1 116.2(3) . . ?
C15 C14 Si1 117.3(4) . . ?
C16 C15 C14 105.3(5) . . ?
C15 C16 C17 108.7(4) . . ?
N1 C17 C16 103.1(4) . . ?
C24 C19 C20 115.6(5) . . ?
C24 C19 Si2 123.4(4) . . ?
C20 C19 Si2 120.9(4) . . ?
C21 C20 C19 121.1(6) . . ?
C22 C21 C20 121.2(5) . . ?
C21 C22 C23 118.8(5) . . ?
C24 C23 C22 119.3(6) . . ?
C23 C24 C19 123.7(5) . . ?
C26 C25 C30 117.8(5) . . ?
C26 C25 Si2 122.0(4) . . ?
C30 C25 Si2 120.2(4) . . ?
C25 C26 C27 121.0(6) . . ?
C28 C27 C26 119.7(6) . . ?
C29 C28 C27 120.0(6) . . ?
C28 C29 C30 121.8(6) . . ?
C29 C30 C25 119.6(6) . . ?
C32 C31 N2 101.8(4) . . ?
C32 C31 Si2 116.1(4) . . ?
N2 C31 Si2 115.0(4) . . ?
C31 C32 C33 104.9(5) . . ?
C34 C33 C32 103.2(5) . . ?
N2 C34 C33 106.6(5) . . ?
O2 Cl1 O4 106.7(3) . . ?
O2 Cl1 O1 111.1(3) . . ?
O4 Cl1 O1 108.2(3) . . ?
O2 Cl1 O3 112.0(4) . . ?
O4 Cl1 O3 111.1(4) . . ?
O1 Cl1 O3 107.7(3) . . ?
O7 Cl2 O5 111.0(4) . . ?
O7 Cl2 O6 110.2(4) . . ?
O5 Cl2 O6 110.3(3) . . ?
O7 Cl2 O8 113.2(5) . . ?
O5 Cl2 O8 104.8(3) . . ?
O6 Cl2 O8 107.2(3) . . ?
C17 N1 C14 107.1(4) . . ?
C31 N2 C34 107.7(4) . . ?
C1 Si1 C2 112.5(3) . . ?
C1 Si1 C8 109.7(3) . . ?
C2 Si1 C8 110.6(2) . . ?
C1 Si1 C14 109.4(3) . . ?
C2 Si1 C14 106.4(2) . . ?
C8 Si1 C14 108.1(2) . . ?
C18 Si2 C19 109.9(3) . . ?
C18 Si2 C25 111.5(3) . . ?
C19 Si2 C25 110.1(2) . . ?
C18 Si2 C31 110.4(3) . . ?
C19 Si2 C31 106.0(2) . . ?
C25 Si2 C31 108.8(2) . . ?
 
# The following lines are used to test the character set of files sent by
# network email or other means. They are not part of the CIF data set
# abcdefghijklmnopqrstuvwxyzABCDEFGHIJKLMNOPQRSTUVWXYZ0123456789
# !@#$%^&*()_+{}:"~<>?|\-=[];'`,./
 
# END of CIF
